# Supplementary material for: Highly selective room temperature acetylene sorption by an unusual triacetylenic phosphine MOF
Source: Royal Society of Chemistry journal article supplement (doi:10.1039/c8cc05402a), 2018-01-01
Supplement: c8cc05402a1.pdf [file c8cc05402a1.pdf]

## Electronic Supplementary Information

### Highly selective room temperature acetylene sorption by an unusual triacetylenic phosphine MOF

Joseph E. Reynolds III,<sup>a</sup> Kelly M. Walsh,<sup>a</sup> Bin Li,<sup>‡,b</sup> Pranaw Kunal,<sup>a</sup> Banglin Chen,<sup>b</sup> and Simon M. Humphrey<sup>a\*</sup>

<sup>a</sup> *Department of Chemistry, The University of Texas at Austin, 100 East 24th Street, Stop A1590, Austin, Texas 78712, United States*

<sup>b</sup> *Department of Chemistry, University of Texas at San Antonio, One UTSA Circle, San Antonio, United States*

<sup>‡</sup>*Present address: State Key Laboratory of Silicon Materials, Cyrus Tang Center for Sensor Materials and Applications, School of Materials Science and Engineering, Zhejiang University, Hang Zhou, 310027, China*

<sup>\*</sup>*E-mail: smh@cm.utexas.edu*

# Contents

|                                                                                                                                                                                                                                        |    |
|----------------------------------------------------------------------------------------------------------------------------------------------------------------------------------------------------------------------------------------|----|
| Experimental .....                                                                                                                                                                                                                     | 4  |
| General Comments.....                                                                                                                                                                                                                  | 4  |
| General Instrumentation.....                                                                                                                                                                                                           | 4  |
| Gas sorption measurements .....                                                                                                                                                                                                        | 5  |
| Fitting of pure component isotherms .....                                                                                                                                                                                              | 5  |
| IAST calculations of adsorption selectivities.....                                                                                                                                                                                     | 6  |
| $Q_{st}$ calculation information.....                                                                                                                                                                                                  | 6  |
| Synthetic Details .....                                                                                                                                                                                                                | 7  |
| Methyl 4-(trimethylsilylethynyl)benzoate synthesis.....                                                                                                                                                                                | 7  |
| Figure S1. $^1\text{H}$ NMR spectrum of methyl 4-(trimethylsilylethynyl)benzoate .....                                                                                                                                                 | 8  |
| Figure S2. $^{13}\text{C}$ NMR spectrum of methyl 4-(trimethylsilylethynyl)benzoate .....                                                                                                                                              | 9  |
| Figure S3. Infrared spectrum of methyl 4-(trimethylsilylethynyl)benzoate .....                                                                                                                                                         | 10 |
| Methyl 4-ethynylbenzoate synthesis.....                                                                                                                                                                                                | 11 |
| Figure S4. $^1\text{H}$ NMR spectrum of methyl 4-ethynylbenzoate .....                                                                                                                                                                 | 12 |
| Figure S5. $^{13}\text{C}$ NMR spectrum of methyl 4-ethynylbenzoate .....                                                                                                                                                              | 13 |
| Figure S6. Infrared spectrum of methyl 4-ethynylbenzoate.....                                                                                                                                                                          | 14 |
| Tris(4-methylcarboxyphenylethynyl)phosphine synthesis .....                                                                                                                                                                            | 15 |
| Figure S7. $^1\text{H}$ NMR spectrum of tris(4-methylcarboxyphenylethynyl)phosphine .....                                                                                                                                              | 16 |
| Figure S8. $^{13}\text{C}$ NMR spectrum of tris(4-methylcarboxyphenylethynyl)phosphine .....                                                                                                                                           | 17 |
| Figure S9. $^{31}\text{P}$ NMR spectrum of tris(4-methylcarboxyphenylethynyl)phosphine.....                                                                                                                                            | 18 |
| Figure S10. Infrared spectrum of tris(4-methylcarboxyphenylethynyl)phosphine.....                                                                                                                                                      | 19 |
| Tris(4-carboxyphenylethynyl)phosphine synthesis .....                                                                                                                                                                                  | 20 |
| Figure S11. $^1\text{H}$ NMR spectrum of tris(4-carboxyphenylethynyl)phosphine .....                                                                                                                                                   | 21 |
| Figure S12. $^{13}\text{C}$ NMR spectrum of tris(4-carboxyphenylethynyl)phosphine .....                                                                                                                                                | 22 |
| Figure S13. $^{31}\text{P}$ NMR spectrum of tris(4-carboxyphenylethynyl)phosphine.....                                                                                                                                                 | 23 |
| Figure S14. Infrared spectrum of tris(4-carboxyphenylethynyl)phosphine.....                                                                                                                                                            | 24 |
| Mn-PCM-48 $[\text{Mn}_3(\mu_3\text{-F})(\text{tcpep})_2(\text{H}_2\text{O})_2(\text{DMF})_1(\text{H}_3\text{O})_{1.1}(\text{F})_{0.5}(\text{Na})_{0.3}(\text{K})_{0.1}] \cdot (\text{H}_2\text{O})_8 \cdot (\text{DMF})_2$ synthesis.. | 25 |
| Table S1. ICP-OES results for Mn-PCM-48 .....                                                                                                                                                                                          | 26 |
| Figure S15. Infrared spectrum of Mn-PCM-48.....                                                                                                                                                                                        | 27 |
| Figure S16. TGA profiles of Mn-PCM-48.....                                                                                                                                                                                             | 28 |
| Figure S17. PXRD patterns of Mn-PCM-48.....                                                                                                                                                                                            | 29 |
| Figure S18. PXRD patterns of metal exposed Mn-PCM-48 in methanol .....                                                                                                                                                                 | 30 |
| Figure S19. PXRD patterns of metal exposed Mn-PCM-48 in acetone.....                                                                                                                                                                   | 31 |

|                                                                                                                                                                                              |    |
|----------------------------------------------------------------------------------------------------------------------------------------------------------------------------------------------|----|
| Figure S20. PXRD pattern of Mn-PCM-48 post-activation.....                                                                                                                                   | 32 |
| Figure S21. C <sub>2</sub> H <sub>2</sub> sorption isotherms at 298 K of acetone exchanged PCM-48 at various activation temperatures.....                                                    | 33 |
| Figure S22. CO <sub>2</sub> sorption isotherms at 298 K of acetone exchanged PCM-48 at various activation temperatures.....                                                                  | 34 |
| Figure S23. Gas sorption isotherms of methanol exchanged Mn-PCM-48 activated at 296 K .....                                                                                                  | 35 |
| Figure S24. Gas adsorption isotherms of acetone exchanged Mn-PCM-48 activated at 296 K .....                                                                                                 | 36 |
| Figure S25. Gas sorption isotherms collected at 273 K of acetone exchanged Mn-PCM-48 activated at 296 K.....                                                                                 | 37 |
| Figure S26. IAST calculation of the component molar loadings with a (15/85, v/v) CO <sub>2</sub> / N <sub>2</sub> mixture at 296 K for Mn-PCM-48.....                                        | 38 |
| Figure S27. IAST calculation of the component molar loadings with an equimolar C <sub>2</sub> H <sub>2</sub> /CH <sub>4</sub> (50/50, v/v) mixture at 296 K for Mn-PCM-48.....               | 39 |
| Figure S28. IAST calculation of the component molar loadings with an equimolar C <sub>2</sub> H <sub>2</sub> /CO <sub>2</sub> (50/50, v/v) mixture at 296 K for Mn-PCM-48.....               | 40 |
| Figure S29. IAST calculation of the component molar loadings with an equimolar CO <sub>2</sub> /CH <sub>4</sub> mixture at 296 K for Mn-PCM-48.....                                          | 41 |
| Figure S30. IAST calculation of the component molar loadings with an equimolar C <sub>2</sub> H <sub>2</sub> /C <sub>2</sub> H <sub>6</sub> (50/50, v/v) mixture at 296 K for Mn-PCM-48..... | 42 |
| Figure S31. IAST calculation of the component molar loadings with a (1/99, v/v) C <sub>2</sub> H <sub>2</sub> /C <sub>2</sub> H <sub>4</sub> mixture at 296 K for Mn-PCM-48.....             | 43 |
| Figure S32. Pore size distribution plot of Mn-PCM-48 <i>via</i> N <sub>2</sub> 77K isotherm .....                                                                                            | 44 |
| References.....                                                                                                                                                                              | 45 |

## Experimental

### General Comments

All syntheses were carried out under a N<sub>2</sub> atmosphere using standard Schleck line techniques. All glassware was oven dried before use (90 °C) for at least 18 hours or flame dried. Hydrochloric acid and potassium hydroxide were purchased through Fischer Scientific. CuI was purchased from Strem Chemicals. PdCl<sub>2</sub>(PPh<sub>3</sub>)<sub>2</sub>, TMS acetylene, and methyl-4-iodobenzoate were all purchased from Combi-Blocks. Phosphorous trichloride (PCl<sub>3</sub>) was purchased from Sigma Aldrich and was then purified through distillation. All organic solvents were purchased from Fischer Scientific. Tetrahydrofuran (THF) was prepared by distillation (Na/benzophenone) and dried over molecular sieves (4 Å). Triethylamine (TEA) was prepared by distillation (CaH<sub>2</sub>) and dried over molecular sieves (4 Å). All other solvents were deoxygenated *via* bubbling N<sub>2</sub> gas for no less than fifteen minutes and dried over sieves.

### General Instrumentation

All analyses were performed in house. All nuclear magnetic resonance (NMR) shifts were software standardized and are expressed as  $\delta$  in parts per million (ppm). Coupling constants (*J*) are reported in Hz and apparent peak multiplicities are noted. <sup>1</sup>H, <sup>13</sup>C, and <sup>31</sup>P NMR analysis were performed on a Varian Unity 300 MHz NMR spectrometer and a Bruker Prodigy 500 MHz NMR spectrometer. High resolution mass spectrometry was performed on an Agilent Technologies 6530 Accurate Mass QToF/MS (ESI). Infrared spectroscopy (IR) was performed on a Thermo Scientific iS50 FT-IR spectrometer. Single Crystal X-Ray Crystallography (SCXRD) was performed on a Bruker Nonius Kappa CCD with Apex II detector using MoK $\alpha$  (0.709 Å) instrument is equipped with an Oxford 600 series Cryostream. Powder X-ray Diffraction (PXRD) was performed on a Rigaku R-Axis Spider diffractometer using CuK $\alpha$  (1.5405 Å) radiation operating at 40 kV and 40 mA. X-ray spectra were collected using a sample rotation speed of 15°/s with data collected in the range 5–40° 2 $\theta$ . Simulated PXRD was generated using single crystal reflection data *via* SimPowPatt facility in PLATON. Thermogravimetric analyses (TGA) were collected

using a TA Instruments Q50 system using high purity N<sub>2</sub> carrier gas. in the range of 25–800 °C. A ramp rate of 3.50 °C s<sup>-1</sup> was applied between 25–500 °C and 5.00 °C s<sup>-1</sup> between 500–800 °C. Inductively coupled plasma optical emission spectrometry (ICP-OES) was conducted on a Varian 710 using pre-dried NaCl and KCl as standards. The standards were dissolved in nano pure 2 % HNO<sub>3</sub> and further diluted for calibration points at 0 ppm, 0.25 ppm, 0.625 ppm, 1.25 ppm, 2.50 ppm, 5.00 ppm, and 10.00 ppm. ICP-OES samples were prepared by digesting Mn-PCM-48 in a CEM-MARS-5 microwave reactor at 120 °C for 2 h in a 1:1 mixture (v:v) of 2 % HNO<sub>3</sub> and trace metal grade aqua regia. Elemental microanalyses were performed by Midwest Microlab LLC (Indianapolis).

### Gas sorption measurements

A Micromeritics ASAP 2020 surface area analyzer was used to measure gas adsorption isotherms. To remove all the guest solvents in the framework, the fresh samples were first solvent-exchanged with dry acetone at least 10 times within two days, and degassed at 273 K for one day, and then at room temperature for additional 24 hours until the outgas rate was 5 mmHg min<sup>-1</sup> prior to measurements. The sorption measurement was maintained at 196 K under dry ice-acetone bath. An ice-water bath (slush) and water bath were used for adsorption isotherms at 273 and 296 K, respectively.

### Fitting of pure component isotherms

Experimental data on pure component isotherms for C<sub>2</sub>H<sub>2</sub>, CO<sub>2</sub>, CH<sub>4</sub>, and N<sub>2</sub> in Mn-PCM-48 were measured at 296 and 273 K. The pure component isotherm data for C<sub>2</sub>H<sub>2</sub>, CO<sub>2</sub>, CH<sub>4</sub>, and N<sub>2</sub> were fitted with the Dual site Langmuir-Freundlich (DSLFF) model:

$$N = N_1^{\max} \frac{b_1 p^{1/n_1}}{1 + b_1 p^{1/n_1}} + N_2^{\max} \frac{b_2 p^{1/n_2}}{1 + b_2 p^{1/n_2}} \quad (\text{S1})$$

where  $p$  (unit: Kpa) is the pressure of the bulk gas at equilibrium with the adsorbed phase,  $N$  (unit: mol/Kg) is the adsorbed amount per mass of adsorbent,  $N_1^{\max}$  and  $N_2^{\max}$  (unit: mol/Kg) are the saturation capacities of sites 1 and 2,  $b_1$  and  $b_2$  (unit: 1/kPa) are the affinity coefficients of sites 1 and 2, and  $n_1$  and

$n_2$  represent the deviations from an ideal homogeneous surface. Here, the single-component  $C_2H_2$ ,  $CO_2$ ,  $CH_4$ , and  $N_2$  adsorption isotherms have been fit to enable the application of IAST in simulating the performance of Mn-PCM-48 under a mixed component gas. Adsorption isotherms and gas selectivity calculated by IAST for mixed  $C_2H_2/CH_4$  (50/50, v/v),  $C_2H_2/CO_2$  (50/50, v/v),  $CO_2/N_2$  (15/85, v/v), and  $CO_2/CH_4$  (50/50, v/v) in the Mn-PCM-48.

### IAST calculations of adsorption selectivities

The selectivity of preferential adsorption of component 1 over component 2 in a mixture containing 1 and 2, can be formally defined as:

$$S_{ads} = \frac{q_1/q_2}{p_1/p_2} \quad (S2)$$

In equation (2),  $q_1$  and  $q_2$  are the absolute component loadings of the adsorbed phase in the mixture. These component loadings are also termed the uptake capacities. We calculate the values of  $q_1$  and  $q_2$  using the Ideal Adsorbed Solution Theory (IAST) of Myers and Prausnitz.

### $Q_{st}$ calculation information

Adsorption isotherms of PCM-48 at 273 K and 296 K and their corresponding  $Q_{st}$  versus loading plots are shown below. The virial-type equation (eq. S3) was used to fit the adsorption data at 273 K and 296 K.  $P$  is the pressure,  $n$  is the amount adsorbed and  $A_0$ ,  $A_1$ ,  $A_2$ , etc. are virial coefficients.  $Q_{st}$  is calculated as a function of surface coverage using the Clausius–Clapeyron equation (eq. S4).

$$\ln\left(\frac{n}{p}\right) = A_0 + A_1 n + A_2 n^2 + \dots \quad (S3)$$

$$Q_{st} = R \ln\left(\frac{P_1}{P_2}\right) \frac{T_1 T_2}{T_2 - T_1} \quad (S4)$$

## Synthetic Details

**Methyl 4-(trimethylsilylethynyl)benzoate synthesis (1).**<sup>1</sup> Methyl 4-iodobenzoate (10.00 g, 38.2 mmol), CuI (145 mg, 0.76 mmol), and PdCl<sub>2</sub>(PPh<sub>3</sub>)<sub>2</sub> (268 mg, .38 mmol) were loaded into a 100 mL Schlenk flask under N<sub>2</sub>. 50 mL of dry THF were added to the flask, followed by the addition of 12.5 mL of dry trimethylamine. After 5 minutes, 6.30 mL of (trimethylsilyl)acetylene (44.0 mmol) were then added. The resulting yellow/orange suspension was allowed to stir overnight. The reaction was then reduced and extracted with ethyl acetate and water. The organic layers were combined and dried over MgSO<sub>4</sub>. The crude product was then purified using column chromatography (eluted with dichloromethane/hexanes (1:2) on silica gel) affording 8.28 g (94 %) of an orange/yellow solid. <sup>1</sup>H NMR (CDCl<sub>3</sub>, 300.14 MHz)  $\delta$  = 0.26 (s, 9H), 3.91 (s, 3H), 7.52 (d, 2H,  $J_{\text{HH}}$  = 9.0 Hz), 7.97 (d, 2H,  $J_{\text{HH}}$  = 9.0 Hz); <sup>13</sup>C{<sup>1</sup>H} NMR (CDCl<sub>3</sub>, 75.48)  $\delta$  = 0.01 (s), 52.39 (s), 97.84 (s), 104.19 (s), 127.90 (s), 129.51 (s), 129.82(s), 132.01 (s), 166.66 (s). FT-IR (ATR):  $\nu_{\text{max}}$  (cm<sup>-1</sup>) = 2952 w, 2899 w, 2159 w, 1716 m, 1602 m, 1442 m, 1405 w, 1274 s, 1244 m, 1108 m, 835 s, 758 s, 695 m, 666 m.

| Parameters |                        |                   |
|------------|------------------------|-------------------|
|            | Parameter              | Value             |
| 1          | Origin                 | Varian            |
| 2          | Instrument             | uplus             |
| 3          | Solvent                | CDCl <sub>3</sub> |
| 4          | Temperature            | 29.0              |
| 5          | Pulse Sequence         | s2pul             |
| 6          | Experiment             | 1D                |
| 7          | Number of Scans        | 16                |
| 8          | Receiver Gain          | 60                |
| 9          | Relaxation Delay       | 1.0000            |
| 10         | Pulse Width            | 3.0000            |
| 11         | Acquisition Time       | 3.8128            |
| 12         | Spectrometer Frequency | 300.14            |
| 13         | Spectral Width         | 4196.4            |
| 14         | Lowest Frequency       | -445.1            |
| 15         | Nucleus                | <sup>1</sup> H    |
| 16         | Acquired Size          | 16000             |
| 17         | Spectral Size          | 65536             |

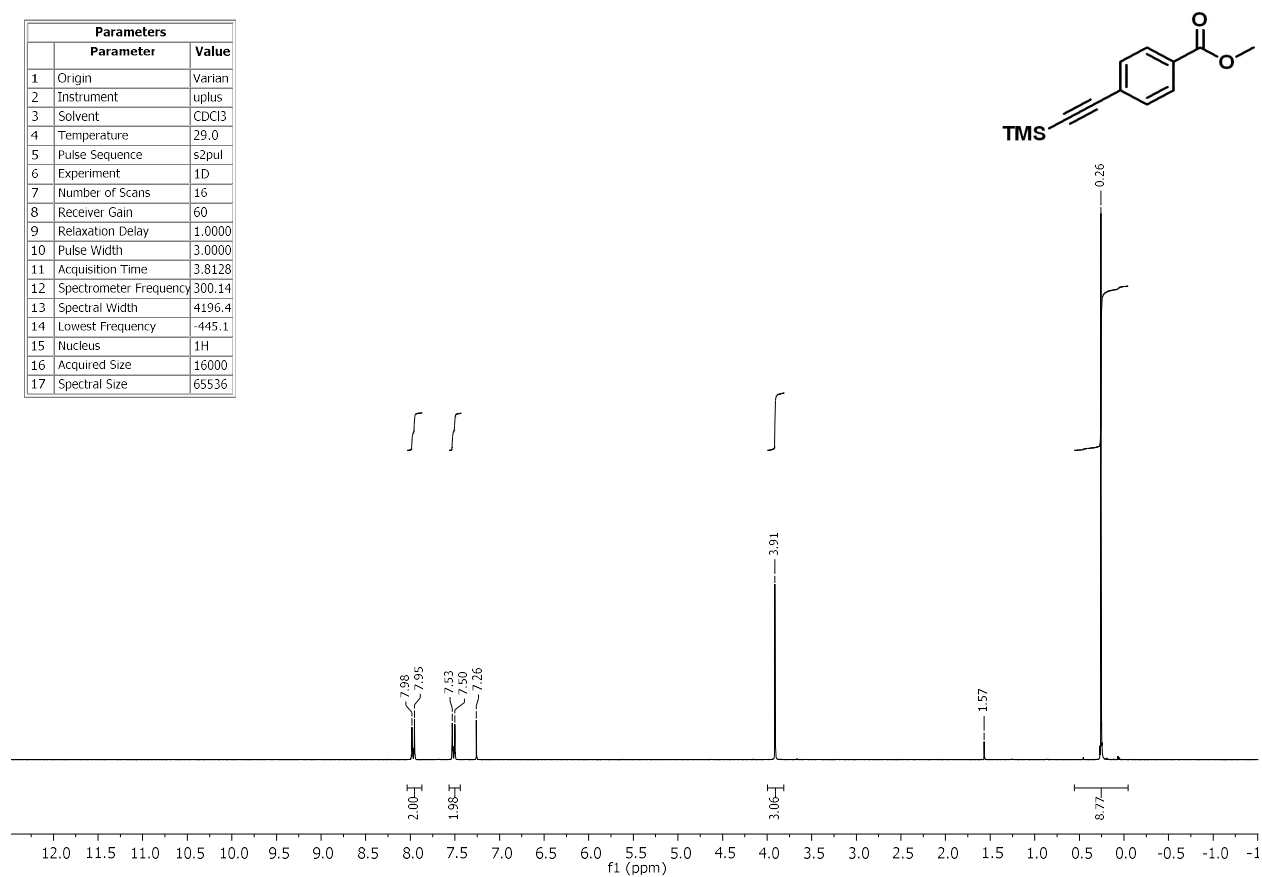

Figure S1. <sup>1</sup>H NMR spectrum of methyl 4-(trimethylsilyl)ethynylbenzoate



| Parameters |                        |                   |
|------------|------------------------|-------------------|
|            | Parameter              | Value             |
| 1          | Origin                 | Varian            |
| 2          | Instrument             | uplus             |
| 3          | Solvent                | CDCl <sub>3</sub> |
| 4          | Temperature            | 29.0              |
| 5          | Pulse Sequence         | s2pul             |
| 6          | Experiment             | 1D                |
| 7          | Number of Scans        | 500               |
| 8          | Receiver Gain          | 60                |
| 9          | Relaxation Delay       | 2.0000            |
| 10         | Pulse Width            | 6.0000            |
| 11         | Acquisition Time       | 1.7768            |
| 12         | Spectrometer Frequency | 75.48             |
| 13         | Spectral Width         | 18009.9           |
| 14         | Lowest Frequency       | -853.9            |
| 15         | Nucleus                | <sup>13</sup> C   |
| 16         | Acquired Size          | 32000             |
| 17         | Spectral Size          | 65536             |

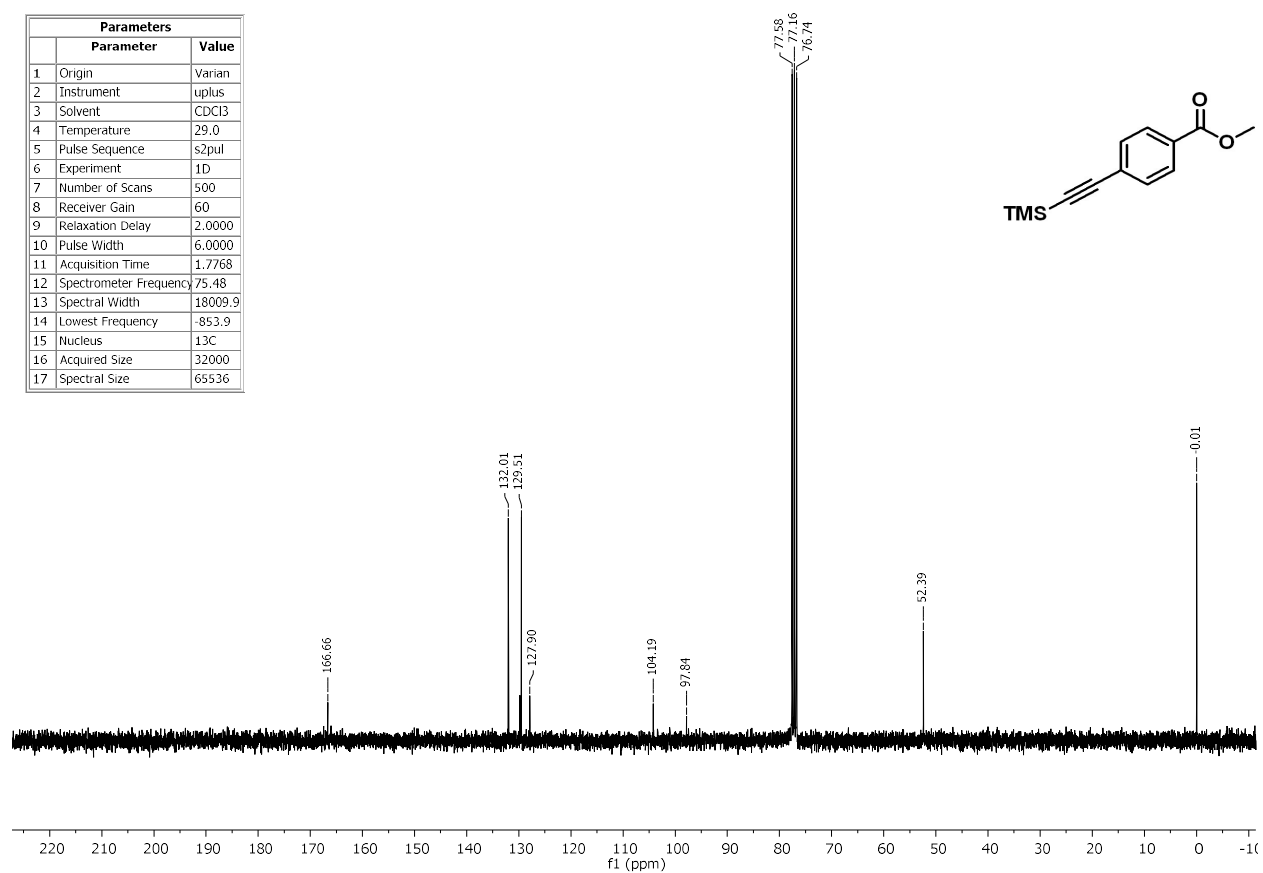

Figure S2. <sup>13</sup>C NMR spectrum of methyl 4-(trimethylsilyl)ethynylbenzoate

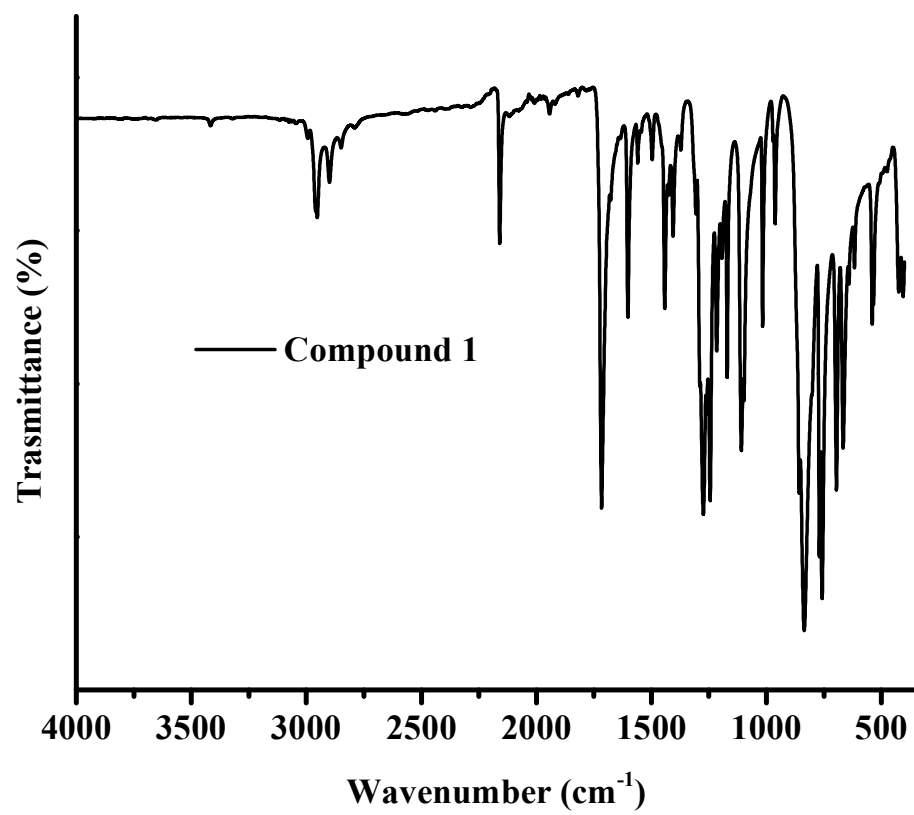

Figure S3. Infrared spectrum of methyl 4-(trimethylsilylethynyl)benzoate

**Methyl 4-ethynylbenzoate synthesis (2).**<sup>1</sup> In a 100 mL round bottom flask, **1** (4.00 g, 17.2 mmol) and K<sub>2</sub>CO<sub>3</sub> (0.952 g, 6.9 mmol) were stirred together in 40 mL of methanol for 1.5 hours. The suspension was reduced to a solid, which was combined with 50 mL of 1 M HCl. The product was extracted with DCM. The organic layers were combined and dried over Na<sub>2</sub>SO<sub>4</sub>. The solvent was removed under reduced pressure to give 2.69 g (98%) of a burnt orange solid. <sup>1</sup>H NMR (CDCl<sub>3</sub>, 300.14 MHz)  $\delta$  = 3.91 (s, 3H), 7.54 (d, 2H,  $J_{\text{HH}}$  = 9.0 Hz), 7.99 (d, 2H,  $J_{\text{HH}}$  = 9.0 Hz); <sup>13</sup>C{<sup>1</sup>H} NMR (CDCl<sub>3</sub>, 75.48)  $\delta$  = 52.42 (s), 80.19 (s), 82.91 (s), 126.86 (s), 129.58 (s), 130.24 (s), 132.20 (s), 166.53 (s). FT-IR (solid):  $\nu_{\text{max}}$  (cm<sup>-1</sup>) = 3241 m, 2951 w, 2103 w, 1699 s, 1606 m, 1433 m, 1349 m, 1277 s, 1192 m, 1174 m, 1108 s, 1016 m, 957 m, 859 m, 770 s, 719 s, 676 s, 528 m, 460 w.

| Parameters |                        |                   |
|------------|------------------------|-------------------|
|            | Parameter              | Value             |
| 1          | Origin                 | Varian            |
| 2          | Instrument             | uplus             |
| 3          | Solvent                | CDCl <sub>3</sub> |
| 4          | Temperature            | 29.0              |
| 5          | Pulse Sequence         | s2pul             |
| 6          | Experiment             | 1D                |
| 7          | Number of Scans        | 16                |
| 8          | Receiver Gain          | 59                |
| 9          | Relaxation Delay       | 1.0000            |
| 10         | Pulse Width            | 3.0000            |
| 11         | Acquisition Time       | 3.8128            |
| 12         | Spectrometer Frequency | 300.14            |
| 13         | Spectral Width         | 4196.4            |
| 14         | Lowest Frequency       | -445.1            |
| 15         | Nucleus                | <sup>1</sup> H    |
| 16         | Acquired Size          | 16000             |
| 17         | Spectral Size          | 65536             |

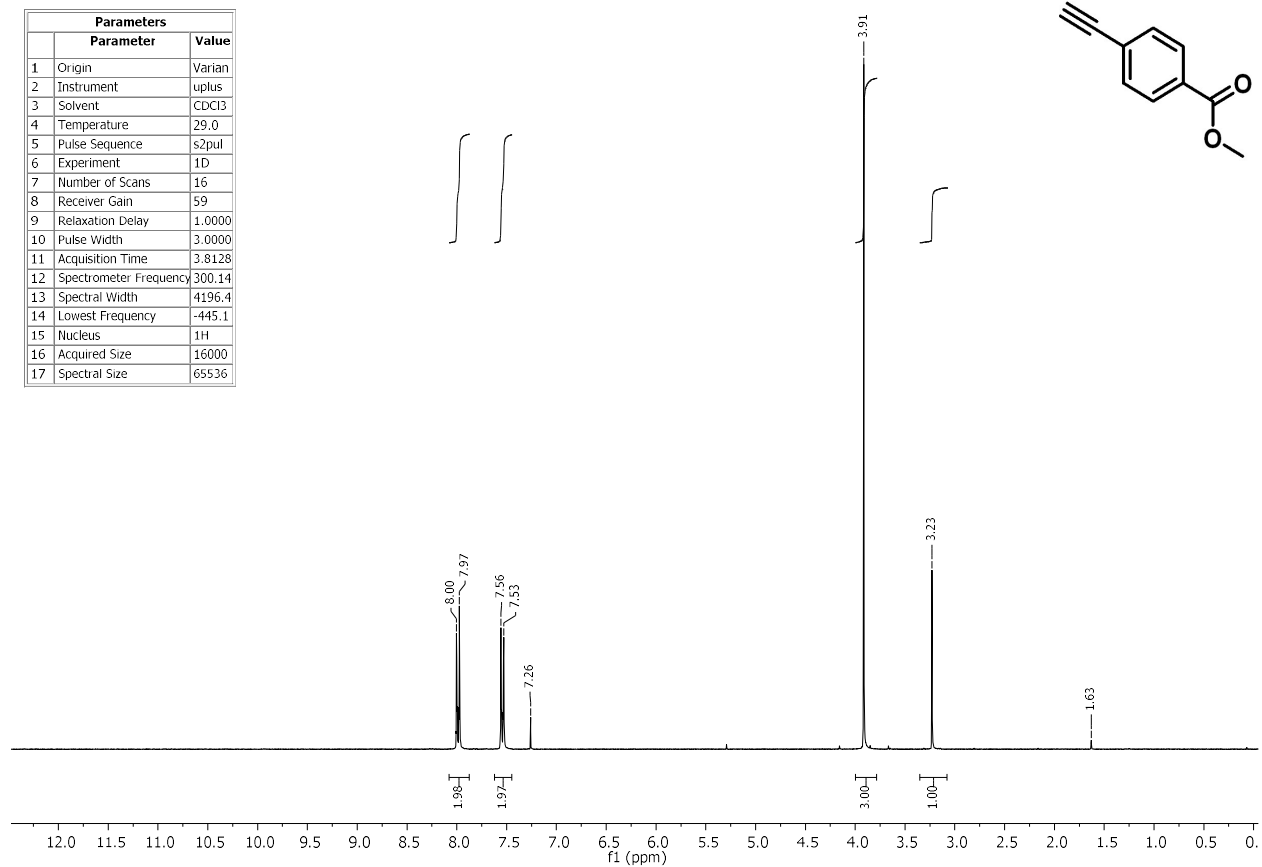

Figure S4. <sup>1</sup>H NMR spectrum of methyl 4-ethynylbenzoate

| Parameters |                        |                   |
|------------|------------------------|-------------------|
|            | Parameter              | Value             |
| 1          | Origin                 | Varian            |
| 2          | Instrument             | uplus             |
| 3          | Solvent                | CDCl <sub>3</sub> |
| 4          | Temperature            | 29.0              |
| 5          | Pulse Sequence         | s2pul             |
| 6          | Experiment             | 1D                |
| 7          | Number of Scans        | 500               |
| 8          | Receiver Gain          | 60                |
| 9          | Relaxation Delay       | 2.0000            |
| 10         | Pulse Width            | 6.0000            |
| 11         | Acquisition Time       | 1.7768            |
| 12         | Spectrometer Frequency | 75.48             |
| 13         | Spectral Width         | 18009.9           |
| 14         | Lowest Frequency       | -853.9            |
| 15         | Nucleus                | <sup>13</sup> C   |
| 16         | Acquired Size          | 32000             |
| 17         | Spectral Size          | 65536             |

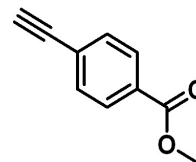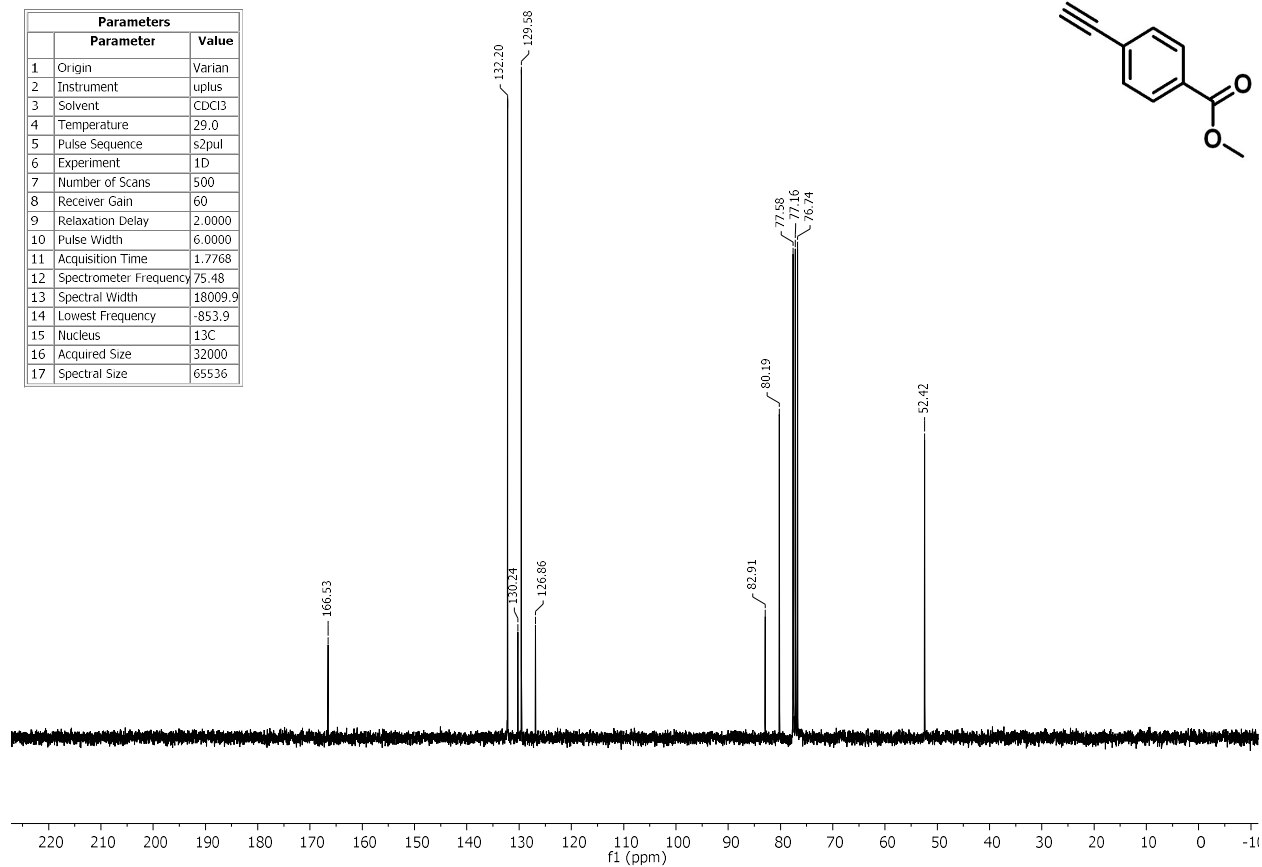

Figure S5. <sup>13</sup>C NMR spectrum of methyl 4-ethynylbenzoate

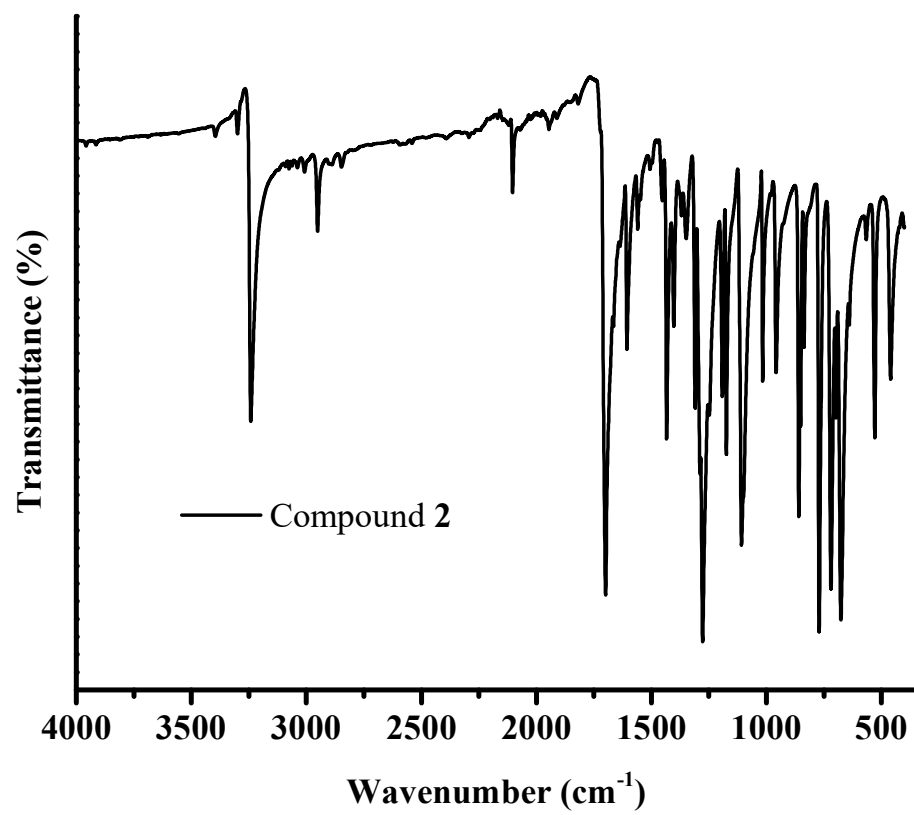

Figure S6. Infrared spectrum of methyl 4-ethynylbenzoate

**Tris(4-methylcarboxyphenylethynyl)phosphine synthesis (3).**<sup>2</sup> Methyl 4-ethynylbenzoate (3.00 g, 18.7 mmol) and CuI (0.18 g, 0.95 mmol) were loaded into a dry 25 mL Schlenk flask under N<sub>2</sub>. The solids were then dissolved in 15 mL of dry toluene. PCl<sub>3</sub> (0.54 mL, 6.2 mmol) and triethylamine 7.8 mL, 55.6 mmol) were then added subsequently to the reaction. The flask was then stirred at room temperature for 1 hour. The reaction was then reduced to a beige solid. The crude product was then purified using column chromatography (eluted with dichloromethane/hexanes (4:1) on silica gel) affording 2.66 g (84 %) of an off-white solid. <sup>1</sup>H NMR (CDCl<sub>3</sub>, 499.39 MHz)  $\delta$  = 3.93 (s, 9H), 7.62 (d, 6H,  $J_{\text{HH}}$  = 9.9 Hz), 8.02 (d, 6H,  $J_{\text{HH}}$  = 9.9 Hz); <sup>13</sup>C{<sup>1</sup>H} NMR (CDCl<sub>3</sub>, 125.58)  $\delta$  = 52.51 (s), 81.82 (d,  $J_{\text{PC}}$  = 5.0 Hz), 105.18 (d,  $J_{\text{PC}}$  = 11.3 Hz), 126.43 (s), 129.66 (s), 130.87(s), 132.17 (s), 166.42 (s); <sup>31</sup>P{<sup>1</sup>H} NMR (CDCl<sub>3</sub>, 202.15 MHz)  $\delta$  = -88.52. FT-IR (ATR):  $\nu_{\text{max}}$  (cm<sup>-1</sup>) = 2953 w, 2167 m, 1715 s, 1602 m, 1560 w, 1431 m, 1268 s, 1191 m, 1170 m, 1103 s, 1013 m, 962 w, 851 s, 814 m, 766 s, 677 s, 533 m, 445 m. HRMS (ESI+)  $m/z$ : [M + Na]<sup>+</sup> Exact mass calculated for [C<sub>30</sub>H<sub>21</sub>O<sub>6</sub>PNa]<sup>+</sup>: 531.0973; Found: 531.0968. Elem. Anal. Calculated for C<sub>30</sub>H<sub>21</sub>O<sub>6</sub>P requires: C 70.87, H 4.16. Found: C 70.88, H 4.29.

| Parameters |                        |                                          |
|------------|------------------------|------------------------------------------|
|            | Parameter              | Value                                    |
| 1          | Solvent                | CDCl <sub>3</sub>                        |
| 2          | Temperature            | 298.0                                    |
| 3          | Pulse Sequence         | zg30                                     |
| 4          | Experiment             | 1D                                       |
| 5          | Probe                  | Z150364_0001 (CPP BBO 500S2 BB-H&F-05 Z) |
| 6          | Number of Scans        | 8                                        |
| 7          | Receiver Gain          | 62.4                                     |
| 8          | Relaxation Delay       | 2.0000                                   |
| 9          | Pulse Width            | 12.0000                                  |
| 10         | Spectrometer Frequency | 499.39                                   |
| 11         | Spectral Width         | 10000.0                                  |
| 12         | Lowest Frequency       | -1962.9                                  |
| 13         | Nucleus                | <sup>1</sup> H                           |
| 14         | Acquired Size          | 32768                                    |
| 15         | Spectral Size          | 65536                                    |

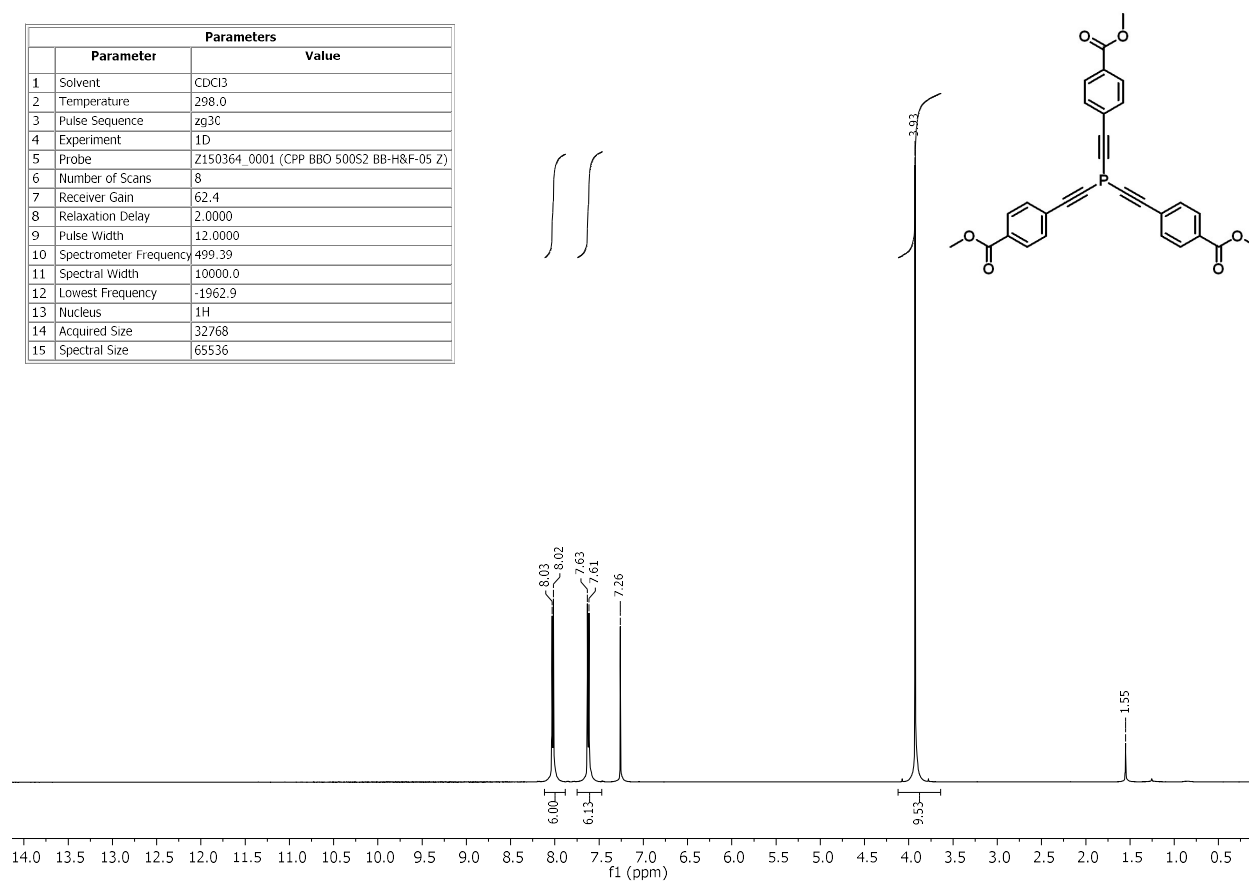

Figure S7. <sup>1</sup>H NMR spectrum of *tris*(4-methylcarboxyphenylethynyl)phosphine



| Parameters |                        |                                          |
|------------|------------------------|------------------------------------------|
|            | Parameter              | Value                                    |
| 1          | Solvent                | CDCl <sub>3</sub>                        |
| 2          | Temperature            | 298.0                                    |
| 3          | Pulse Sequence         | zgpg30                                   |
| 4          | Experiment             | 1D                                       |
| 5          | Probe                  | Z150364_0001 (CPP BBO 500S2 BB-H&F-05 Z) |
| 6          | Number of Scans        | 1024                                     |
| 7          | Receiver Gain          | 201.6                                    |
| 8          | Relaxation Delay       | 2.0000                                   |
| 9          | Pulse Width            | 10.0000                                  |
| 10         | Spectrometer Frequency | 125.58                                   |
| 11         | Spectral Width         | 29761.9                                  |
| 12         | Lowest Frequency       | -2305.7                                  |
| 13         | Nucleus                | <sup>13</sup> C                          |
| 14         | Acquired Size          | 32768                                    |
| 15         | Spectral Size          | 65536                                    |

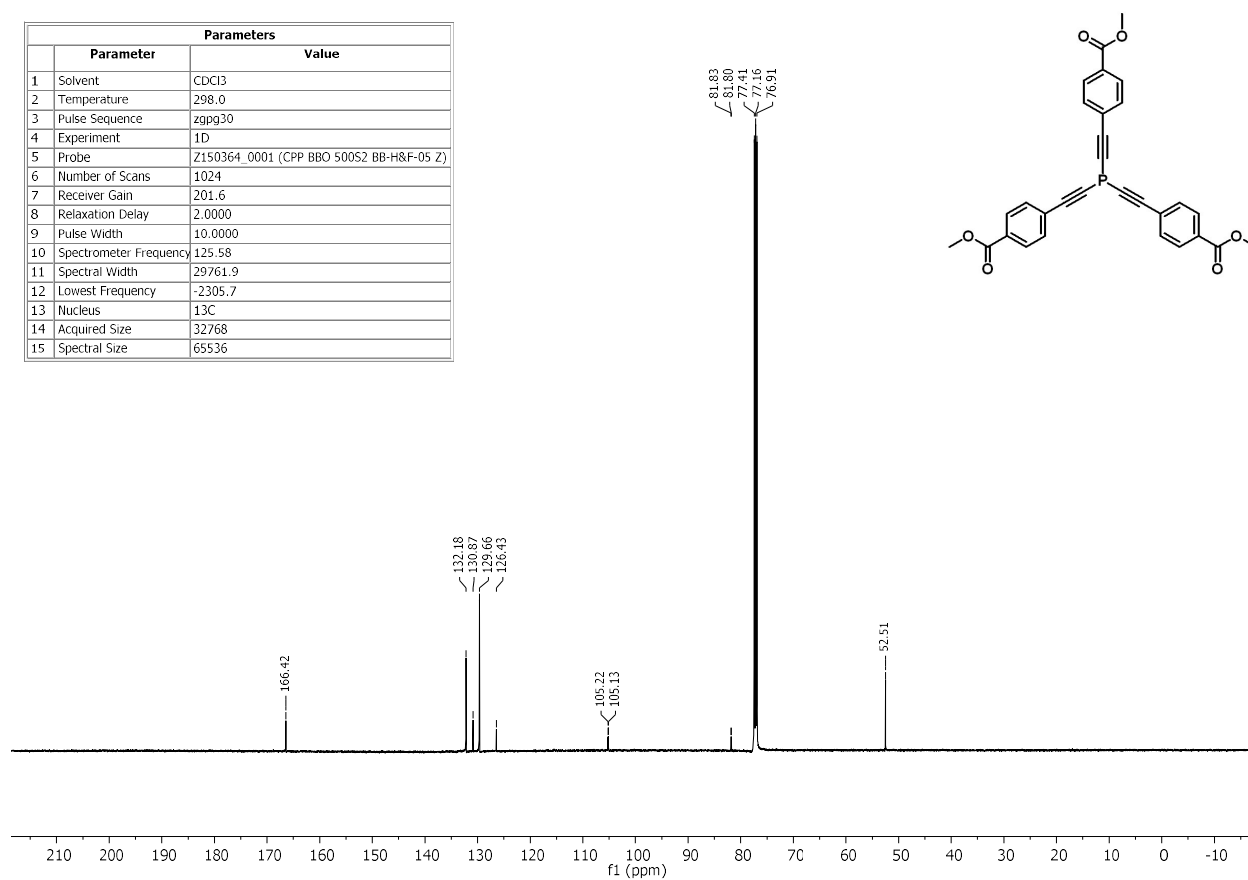

Figure S8. <sup>13</sup>C NMR spectrum of *tris*(4-methylcarboxyphenylethynyl)phosphine

| Parameters |                        |                                          |
|------------|------------------------|------------------------------------------|
|            | Parameter              | Value                                    |
| 1          | Solvent                | CDCl <sub>3</sub>                        |
| 2          | Temperature            | 298.0                                    |
| 3          | Pulse Sequence         | zgpg30                                   |
| 4          | Experiment             | 1D                                       |
| 5          | Probe                  | Z150364_0001 (CPP BBO 500S2 B8-H&F-05 Z) |
| 6          | Number of Scans        | 64                                       |
| 7          | Receiver Gain          | 201.6                                    |
| 8          | Relaxation Delay       | 2.0000                                   |
| 9          | Pulse Width            | 12.0000                                  |
| 10         | Spectrometer Frequency | 202.15                                   |
| 11         | Spectral Width         | 81521.7                                  |
| 12         | Lowest Frequency       | -50868.7                                 |
| 13         | Nucleus                | 31P                                      |
| 14         | Acquired Size          | 32768                                    |
| 15         | Spectral Size          | 65536                                    |

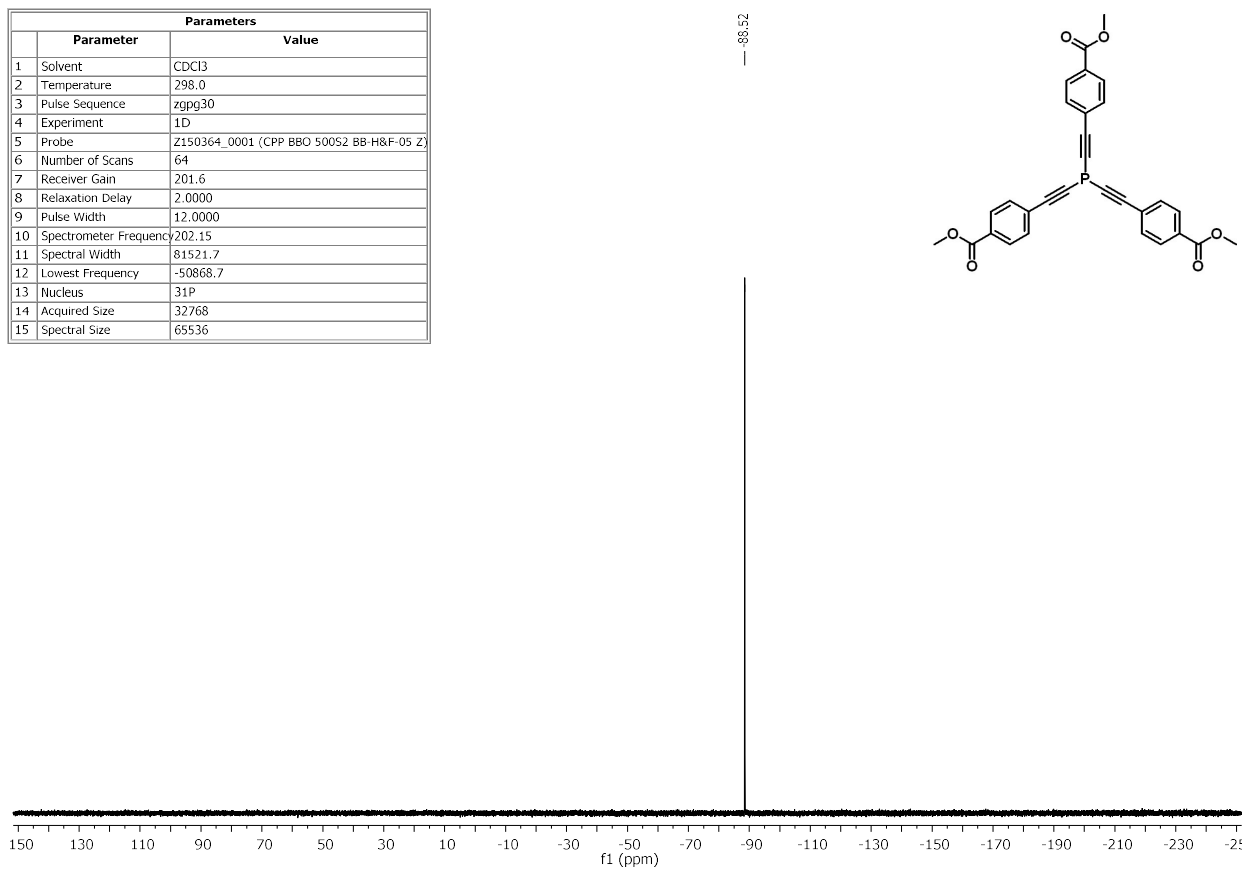

Figure S9. 31P NMR spectrum of *tris*(4-methylcarboxyphenylethynyl)phosphine

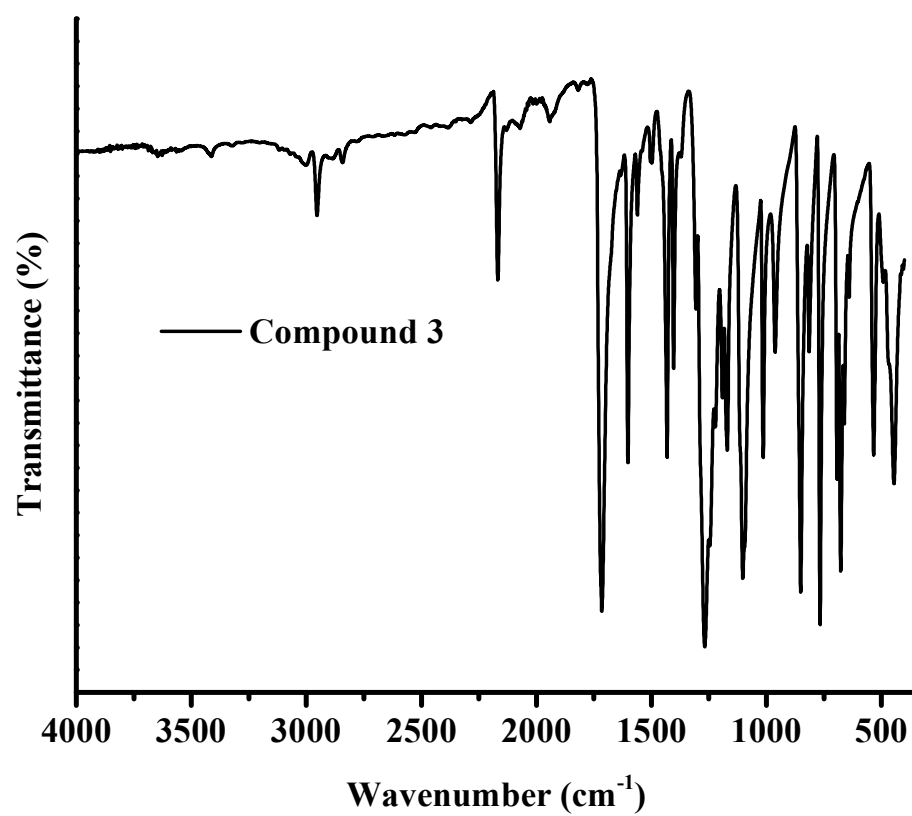

Figure S10. Infrared spectrum of *tris*(4-methylcarboxyphenylethynyl)phosphine

**Tris(4-carboxyphenylethynyl)phosphine synthesis (tcpepH<sub>3</sub>).** In a 25 mL schlenk tube under N<sub>2</sub>, **3** (200 mg, 0.4 mmol) was dissolved in dry THF and degassed 0.5 M KOH<sub>(aq)</sub> (2.8 mL, 1.4 mmol) was then added. The resulting orange emulsion was then allowed to stir at room temperature for 24 hours. Diethyl ether was then added to extract the organic layer. The remaining aqueous layer was then acidified to pH = 2 using 2 M HCl. The resulting crude white precipitate was collected *via* centrifugation. The product was purified by recrystallization in methanol affording 170 mg (93 %) of the title compound. <sup>1</sup>H NMR (DMSO-d<sub>6</sub>, 499.39 MHz)  $\delta$  = 7.75 (d, 6H,  $J_{\text{HH}}$  = 9.9 Hz), 7.98 (d, 6H,  $J_{\text{HH}}$  = 9.9 Hz); <sup>13</sup>C{<sup>1</sup>H} NMR (DMSO-d<sub>6</sub>, 125.58)  $\delta$  = 80.73 (d,  $J_{\text{PC}}$  = 5.0 Hz), 105.28 (d,  $J_{\text{PC}}$  = 11.3 Hz), 124.58 (s), 129.60 (s), 131.96 (s), 132.23 (s), 166.47 (s); <sup>31</sup>P{<sup>1</sup>H} NMR (DMSO-*d*<sub>6</sub>, 202.15 MHz)  $\delta$  = -88.84. FT-IR (ATR):  $\nu_{\text{max}}$  (cm<sup>-1</sup>) = 3330 w (br), 2839 w (br), 2666 w (br), 2543 w (br), 2169 w, 1726 s, 1674 s, 1603 s, 1560 w, 1419 m, 1372 w, 1304 m, 1284 m, 1211 m, 1100 w, 1015 w, 934 w (br), 853 s, 767 s, 730 w, 691 w, 665 m, 641 m, 555 w, 527 m, 482 m. HRMS (ESI-)  $m/z$ : [M - H]<sup>-</sup> Exact mass calculated for [C<sub>27</sub>H<sub>14</sub>O<sub>6</sub>P]<sup>-</sup>: 465.0528; Found: 465.0533. Elem. Anal. Calculated for C<sub>27</sub>H<sub>15</sub>O<sub>6</sub>P requires: C 69.53, H 3.24. Found: C 69.03, H 3.43.

| Parameters |                        |                                          |
|------------|------------------------|------------------------------------------|
|            | Parameter              | Value                                    |
| 1          | Solvent                | DMSO                                     |
| 2          | Temperature            | 298.0                                    |
| 3          | Pulse Sequence         | zg30                                     |
| 4          | Experiment             | 1D                                       |
| 5          | Probe                  | Z150364_0001 (CPP BBO 500S2 BB-H&F-05 Z) |
| 6          | Number of Scans        | 16                                       |
| 7          | Receiver Gain          | 55.5                                     |
| 8          | Relaxation Delay       | 2.0000                                   |
| 9          | Pulse Width            | 12.0000                                  |
| 10         | Spectrometer Frequency | 499.39                                   |
| 11         | Spectral Width         | 10000.0                                  |
| 12         | Lowest Frequency       | -1916.3                                  |
| 13         | Nucleus                | <sup>1</sup> H                           |
| 14         | Acquired Size          | 32768                                    |
| 15         | Spectral Size          | 65536                                    |

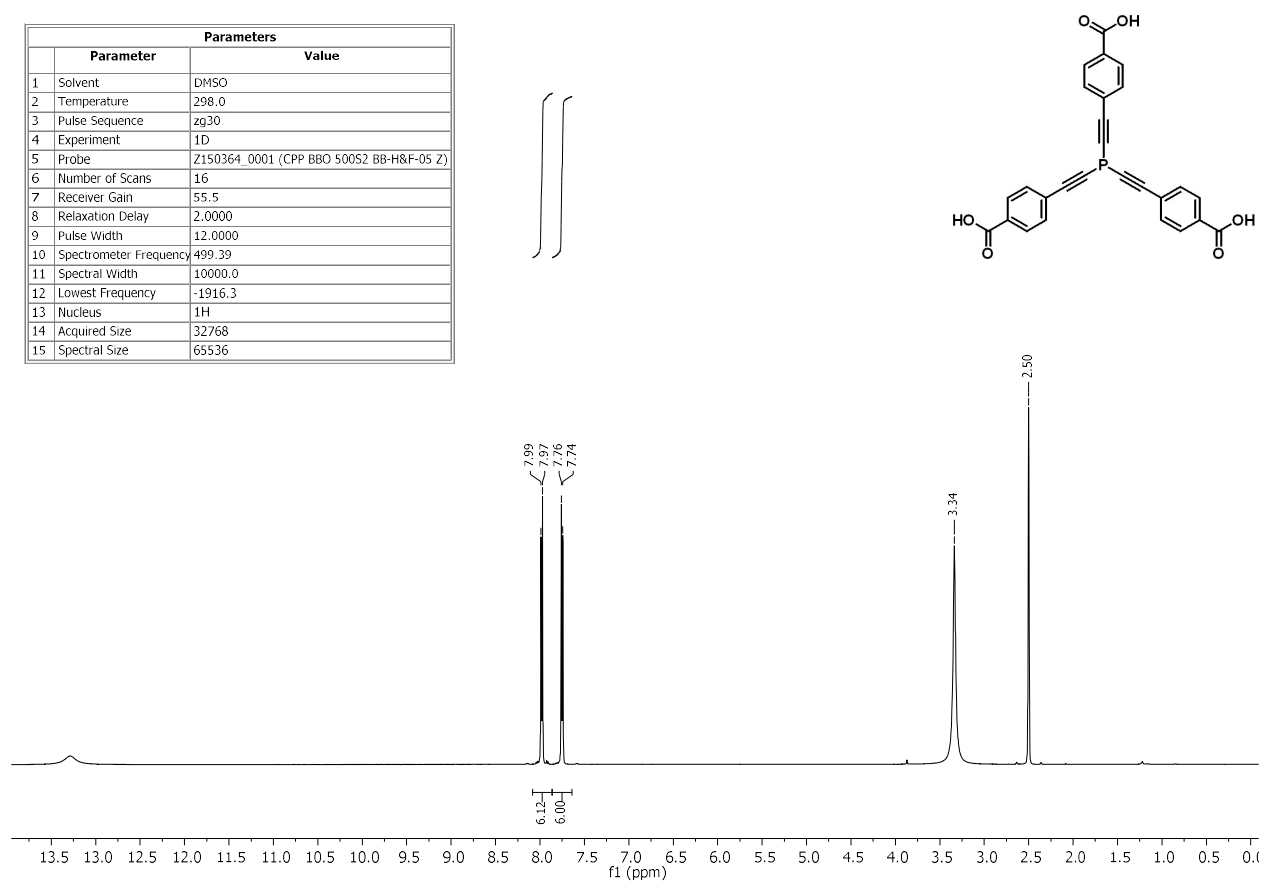

Figure S11. <sup>1</sup>H NMR spectrum of tris(4-carboxyphenylethynyl)phosphine

| Parameters |                        |                                          |
|------------|------------------------|------------------------------------------|
|            | Parameter              | Value                                    |
| 1          | Solvent                | DMSO                                     |
| 2          | Temperature            | 298.0                                    |
| 3          | Pulse Sequence         | zgpg30                                   |
| 4          | Experiment             | 1D                                       |
| 5          | Probe                  | Z150364_0001 (CPP BBO 500S2 BB-H&F-05 Z) |
| 6          | Number of Scans        | 1024                                     |
| 7          | Receiver Gain          | 201.6                                    |
| 8          | Relaxation Delay       | 2.0000                                   |
| 9          | Pulse Width            | 10.0000                                  |
| 10         | Spectrometer Frequency | 125.58                                   |
| 11         | Spectral Width         | 29761.9                                  |
| 12         | Lowest Frequency       | -2381.5                                  |
| 13         | Nucleus                | <sup>13</sup> C                          |
| 14         | Acquired Size          | 32768                                    |
| 15         | Spectral Size          | 65536                                    |

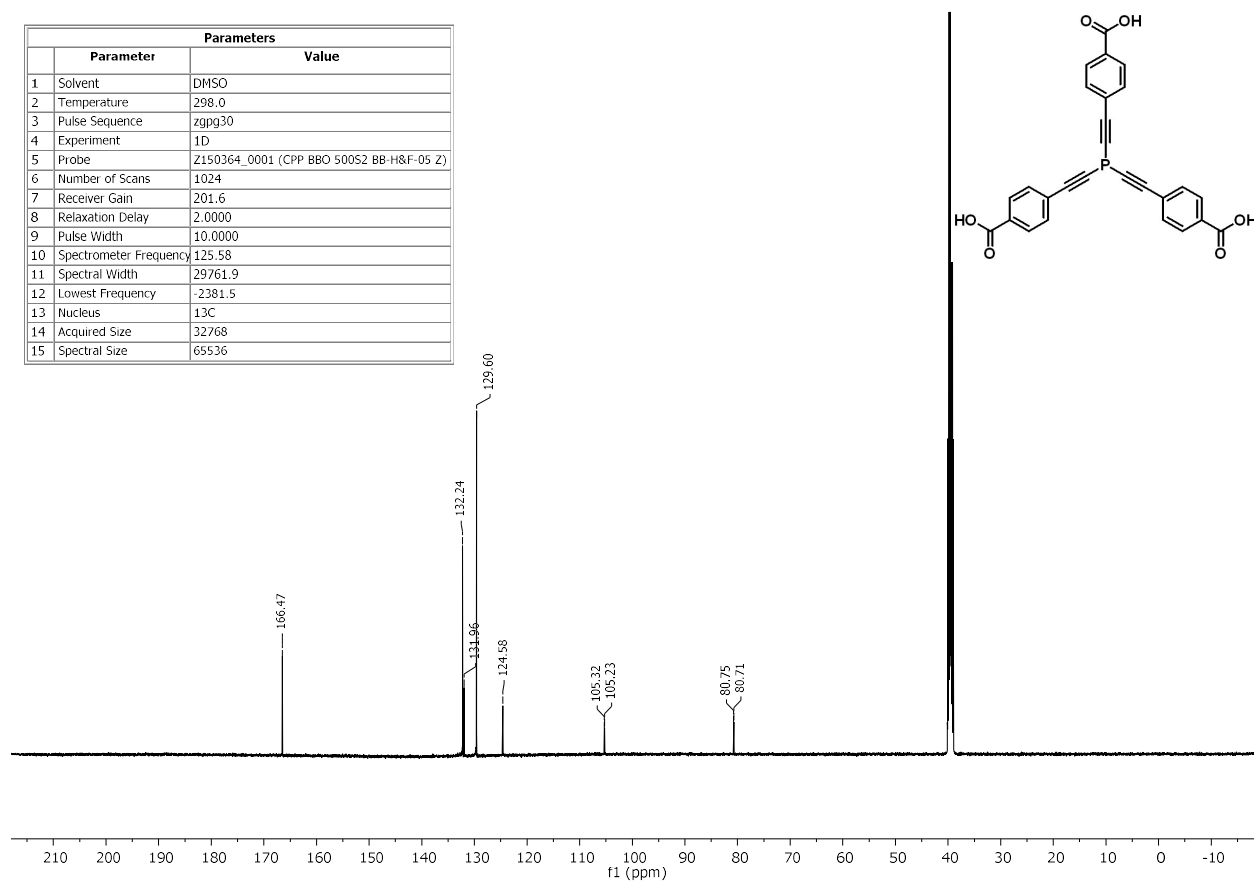

Figure S12. <sup>13</sup>C NMR spectrum of *tris*(4-carboxyphenylethynyl)phosphine

| Parameters |                        |                                          |
|------------|------------------------|------------------------------------------|
|            | Parameter              | Value                                    |
| 1          | Solvent                | DMSO                                     |
| 2          | Temperature            | 298.0                                    |
| 3          | Pulse Sequence         | zgpg30                                   |
| 4          | Experiment             | 1D                                       |
| 5          | Probe                  | Z150364_0001 (CPP BBO 500S2 BB-H&F-05 Z) |
| 6          | Number of Scans        | 128                                      |
| 7          | Receiver Gain          | 201.6                                    |
| 8          | Relaxation Delay       | 2.0000                                   |
| 9          | Pulse Width            | 12.0000                                  |
| 10         | Spectrometer Frequency | 202.15                                   |
| 11         | Spectral Width         | 81521.7                                  |
| 12         | Lowest Frequency       | -50868.7                                 |
| 13         | Nucleus                | 31P                                      |
| 14         | Acquired Size          | 32768                                    |
| 15         | Spectral Size          | 65536                                    |

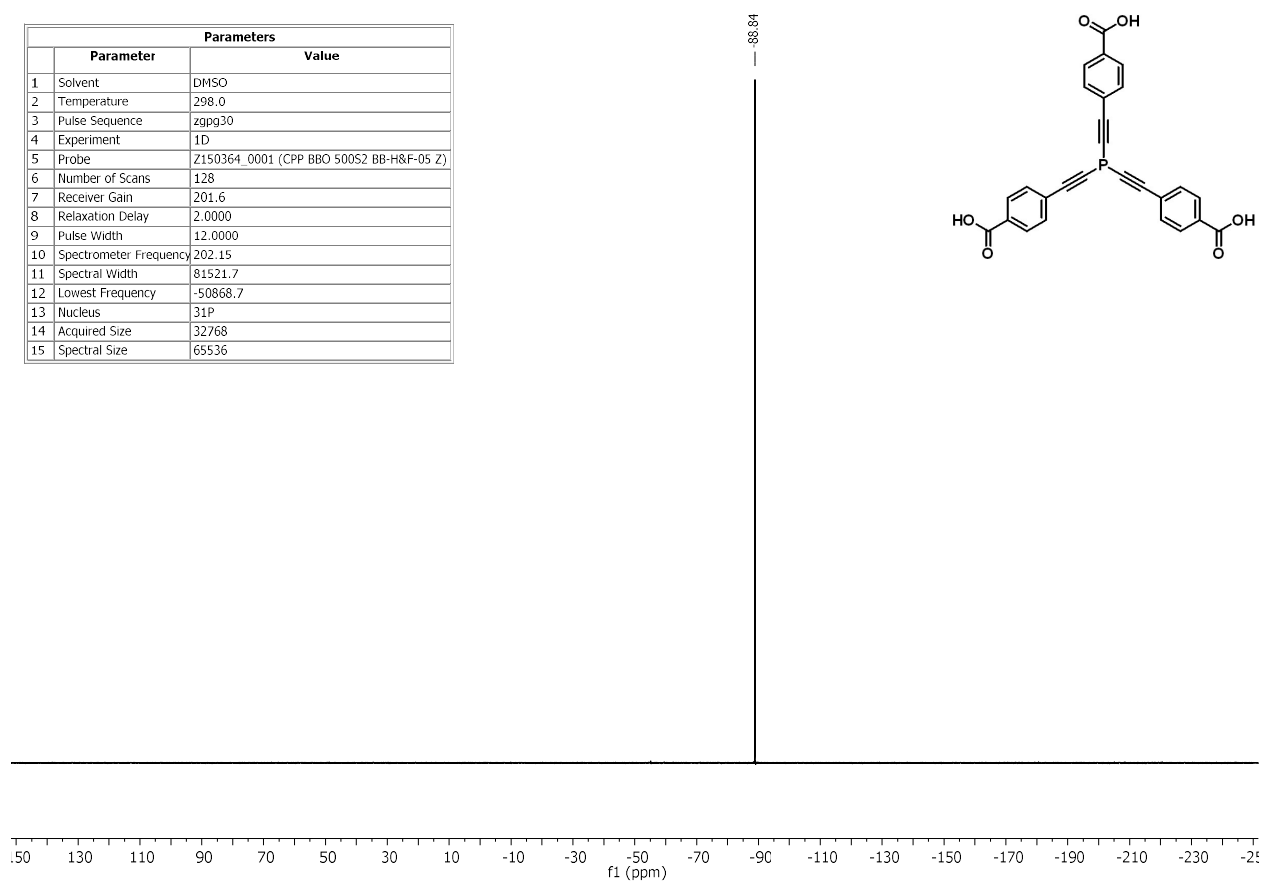

Figure S13.  $^{31}\text{P}$  NMR spectrum of *tris*(4-carboxyphenylethynyl)phosphine

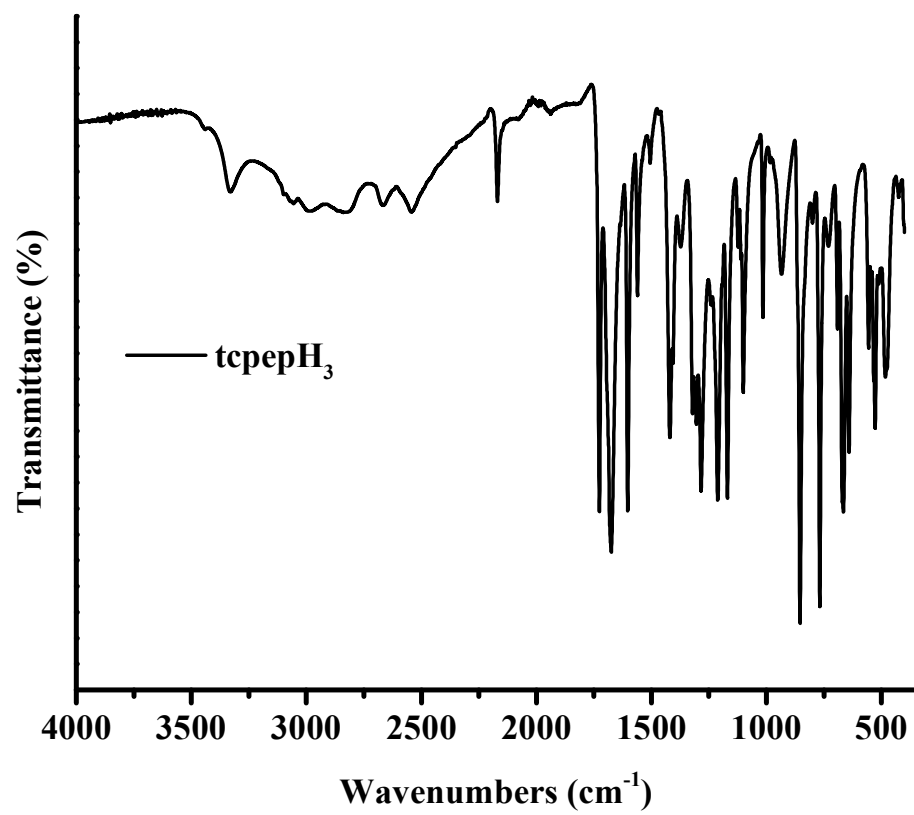

Figure S14. Infrared spectrum of *tris*(4-carboxyphenylethynyl)phosphine



**Mn-PCM-48 [Mn<sub>3</sub>(μ<sub>3</sub>-F)(tcpep)<sub>2</sub>(H<sub>2</sub>O)<sub>2</sub>(DMF)<sub>1</sub>(H<sub>3</sub>O)<sub>1.1</sub>(F)<sub>0.5</sub>(Na)<sub>0.3</sub>(K)<sub>0.1</sub>]·(H<sub>2</sub>O)<sub>8</sub>·(DMF)<sub>2</sub> synthesis.**

In a 20 mL glass scintillation vial, MnCl<sub>2</sub> · 4H<sub>2</sub>O (19.1 mg, 0.10 mmol), CsF (15 mg, 0.10 mmol), and **tcpepH<sub>3</sub>** (15 mg, 0.03 mmol) were dissolved in 5 mL of DMF: H<sub>2</sub>O: EtOH (1:1:1, v:v). The vial was placed in a graphite heating bath (75 °C) for 3-5 days. The crystalline material was washed with fresh solvent and filtered affording 12 mg (33% crystalline yield) of a crystalline yellow prismatic solid. IR (solid): ν<sub>max</sub> (cm<sup>-1</sup>) = 3275 w (br), 2162 w, 1651 m, 1600 m, 1578 m, 1530 m, 1382 s, 1175 w, 1100 w, 1015 w, 858 m, 781 m, 676 m, 528 w, 421 m. Elem. Anal. Calculated for activated PCM-48, C<sub>54</sub>P<sub>2</sub>F<sub>1.5</sub>O<sub>19.6</sub>H<sub>40.3</sub>Mn<sub>3</sub>Na<sub>0.3</sub>K<sub>0.1</sub> requires: C 51.11, H 3.2, F 2.25, Na 0.54, K 0.31. Found: C 51.00, H 2.50, N none, F 2.29, Na 0.53, K 0.33.

**Table S1. ICP-OES results for Mn-PCM-48**

| <b>Element Analyzed</b> | <b>Average value found (ppm)</b> | <b>Mass of Mn-PCM-48 (mg)</b> | <b>Volume of analyte (mL)</b> | <b>Concentration of analyte (ppm)</b> | <b>Component weight (%)</b> |
|-------------------------|----------------------------------|-------------------------------|-------------------------------|---------------------------------------|-----------------------------|
| <b>K</b>                | 0.638                            | 2.0                           | 10.24                         | 195.3                                 | 0.33                        |
| <b>Na</b>               | 1.042                            | 2.0                           | 10.24                         | 195.3                                 | 0.53                        |

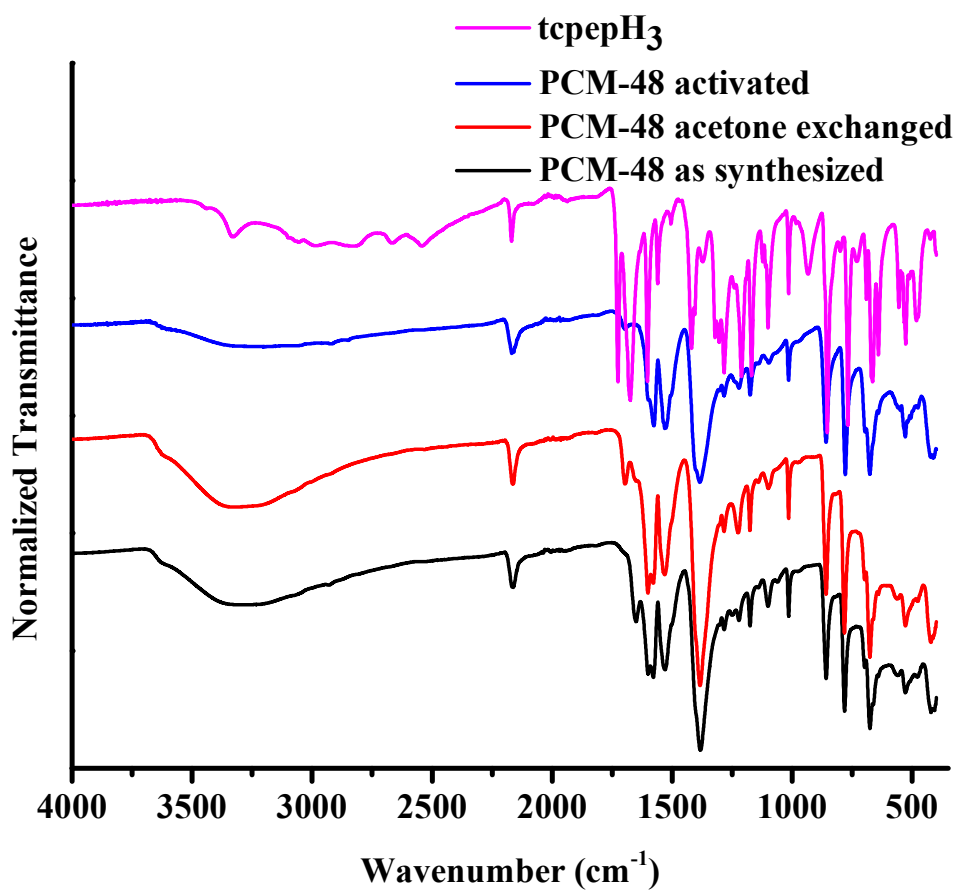

Figure S15. Infrared spectrum of Mn-PCM-48

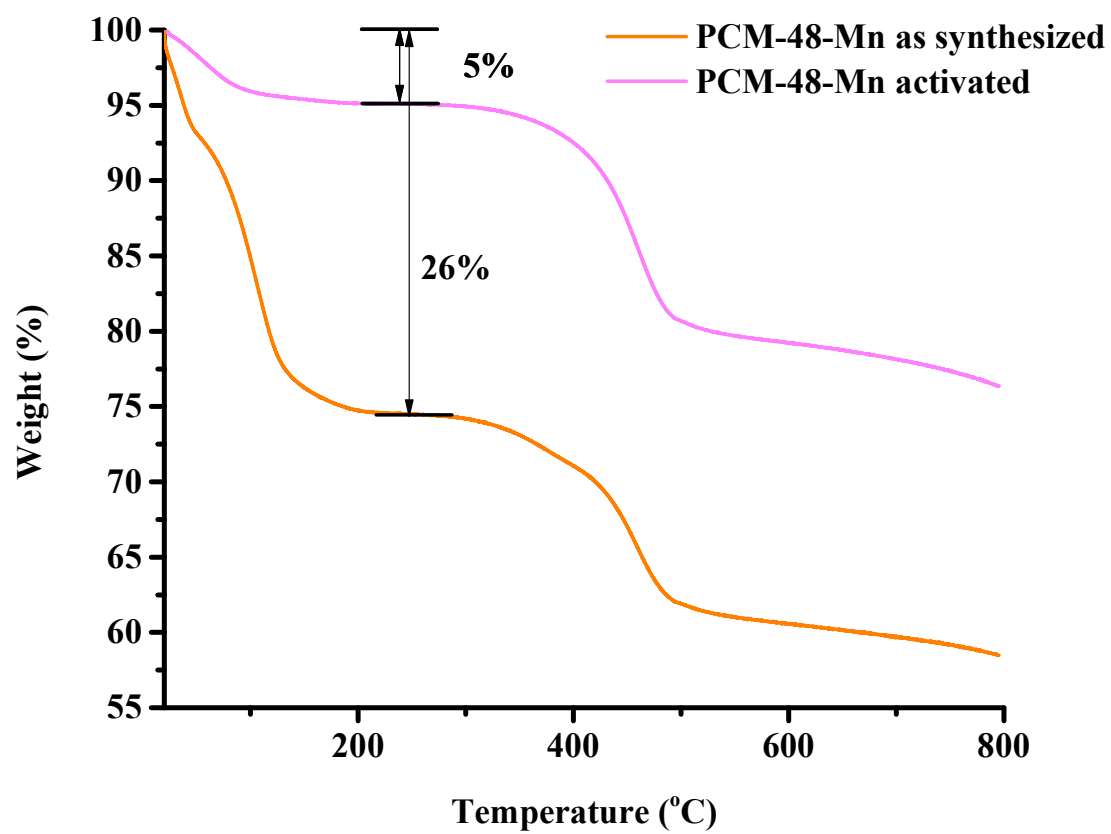

Figure S16. TGA profiles of Mn-PCM-48

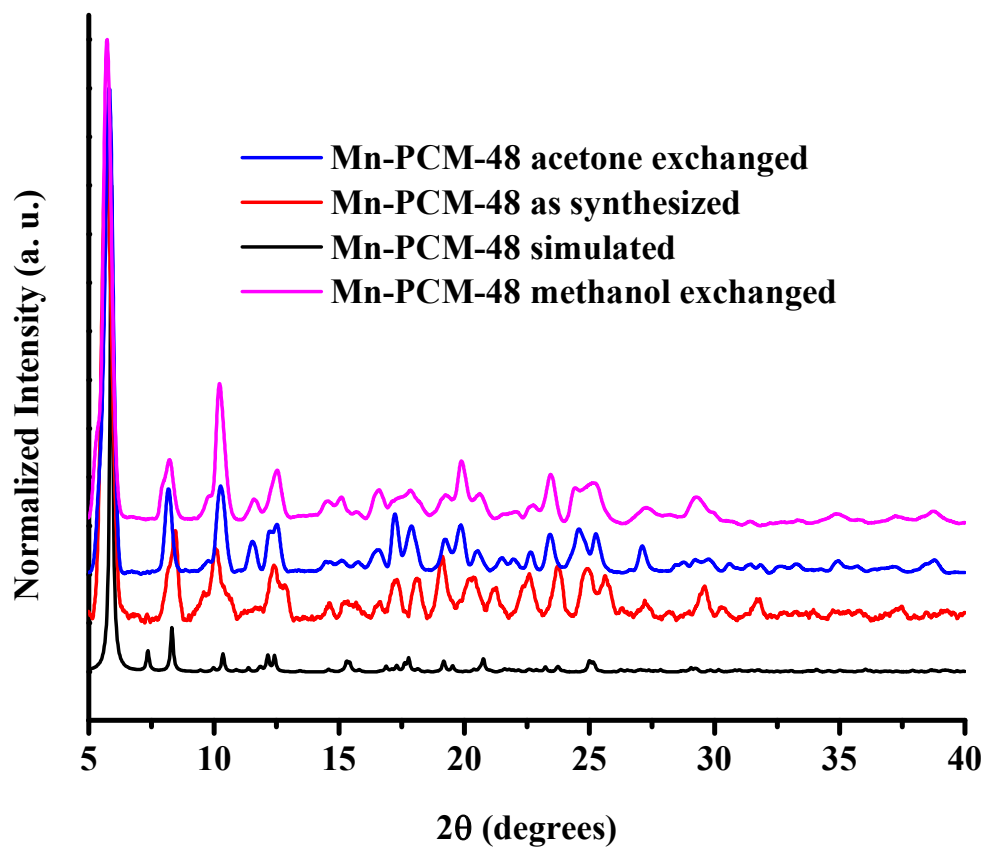

Figure S17. PXRD patterns of Mn-PCM-48

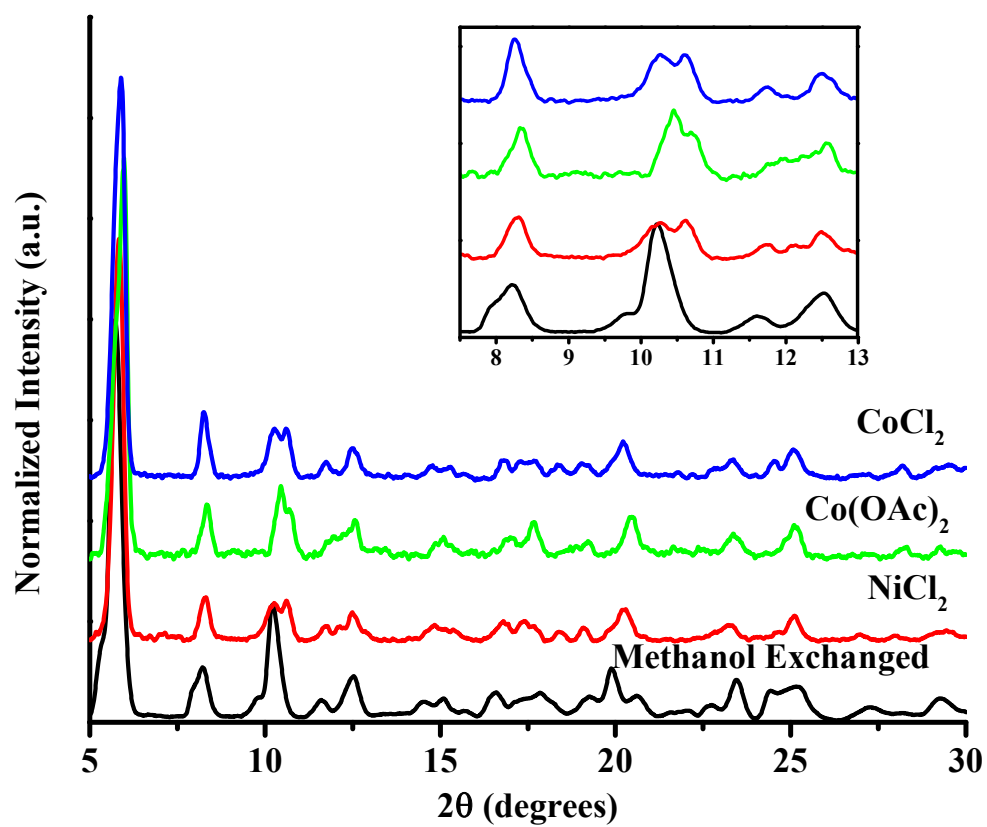

Figure S18. PXRD patterns of metal exposed Mn-PCM-48 in methanol

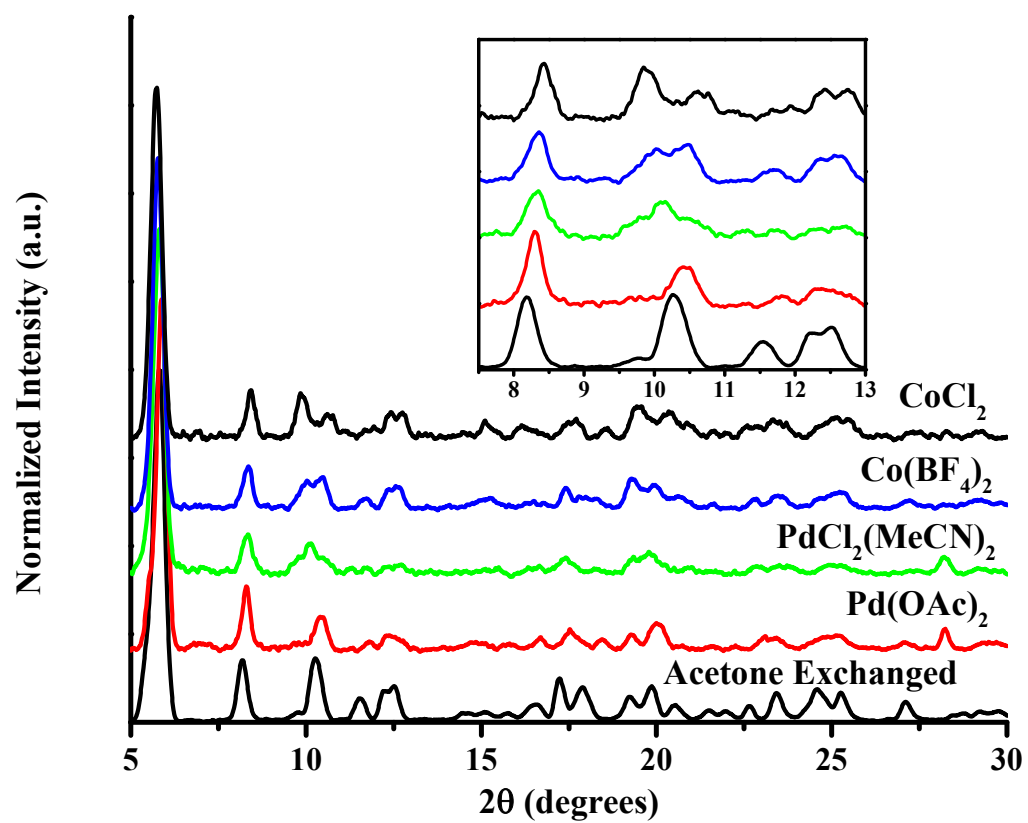

Figure S19. PXRD patterns of metal exposed Mn-PCM-48 in acetone

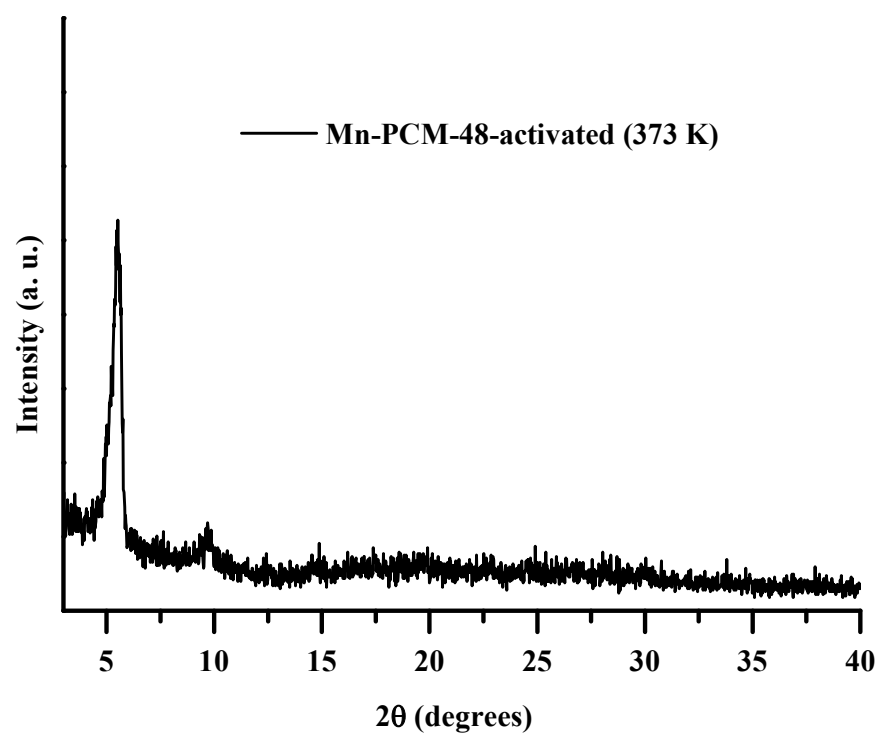

Figure S20. PXRD pattern of Mn-PCM-48 post-activation



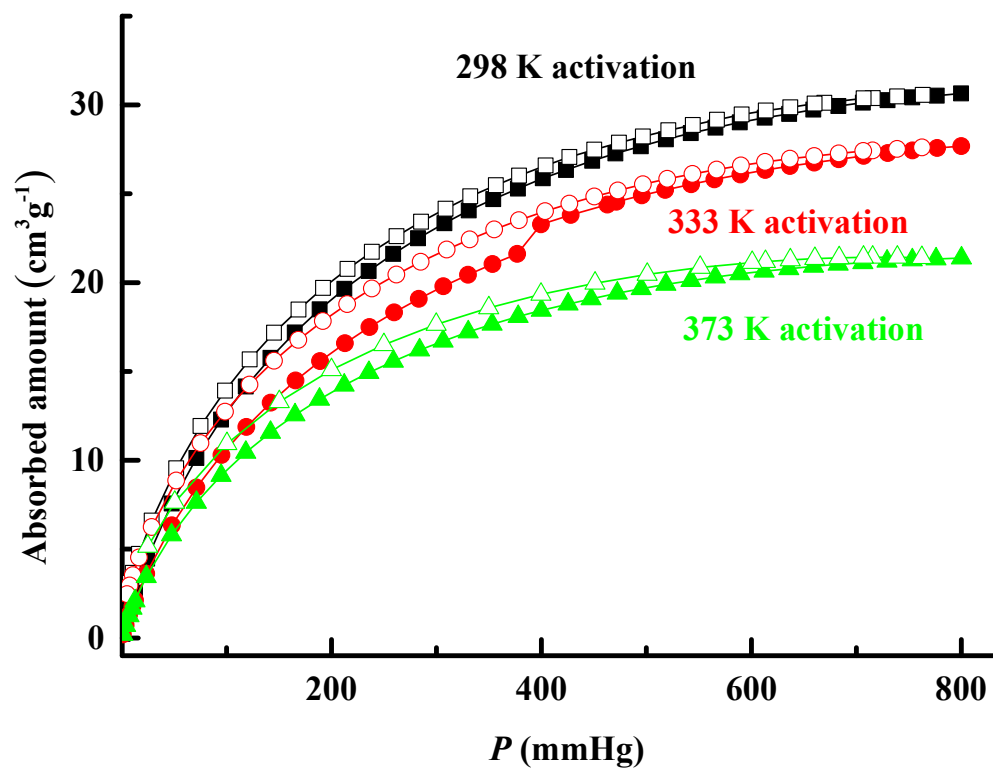

Figure S21. C<sub>2</sub>H<sub>2</sub> sorption isotherms at 298 K of acetone exchanged PCM-48 at various activation temperatures

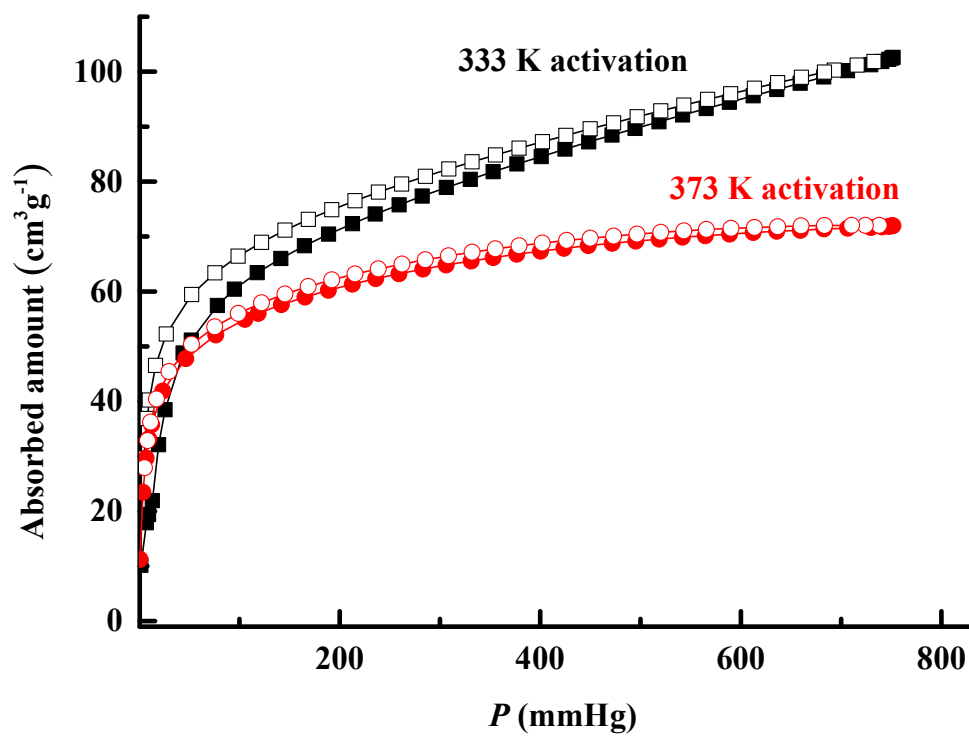

Figure S22. CO<sub>2</sub> sorption isotherms at 298 K of acetone exchanged PCM-48 at various activation temperatures

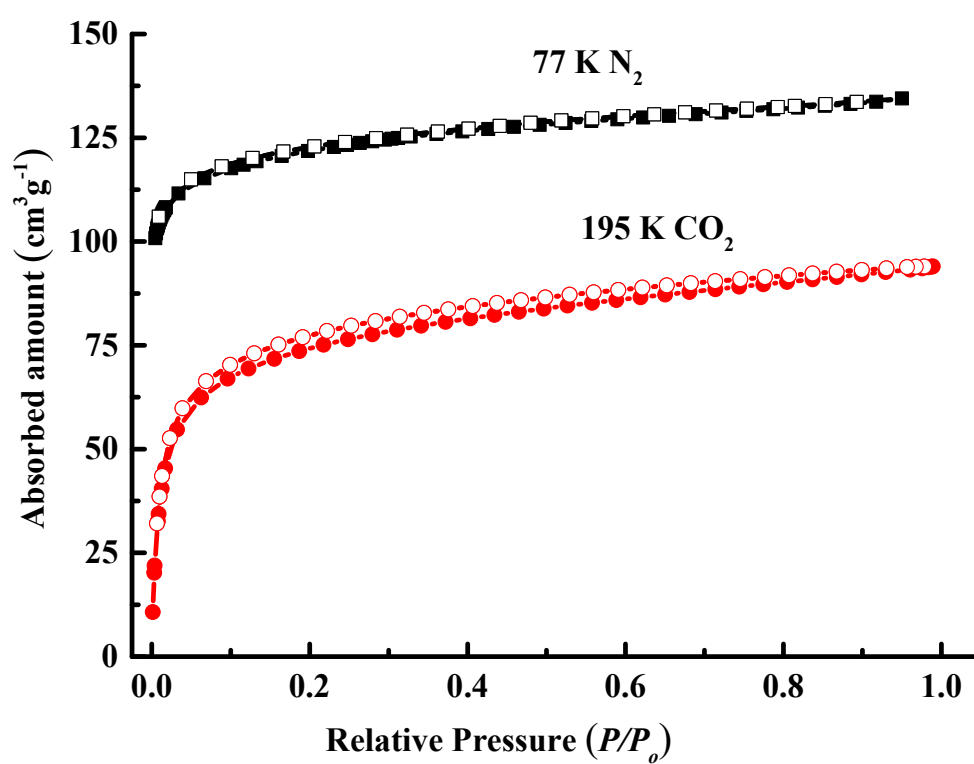

Figure S23. Gas sorption isotherms of methanol exchanged Mn-PCM-48 activated at 296 K

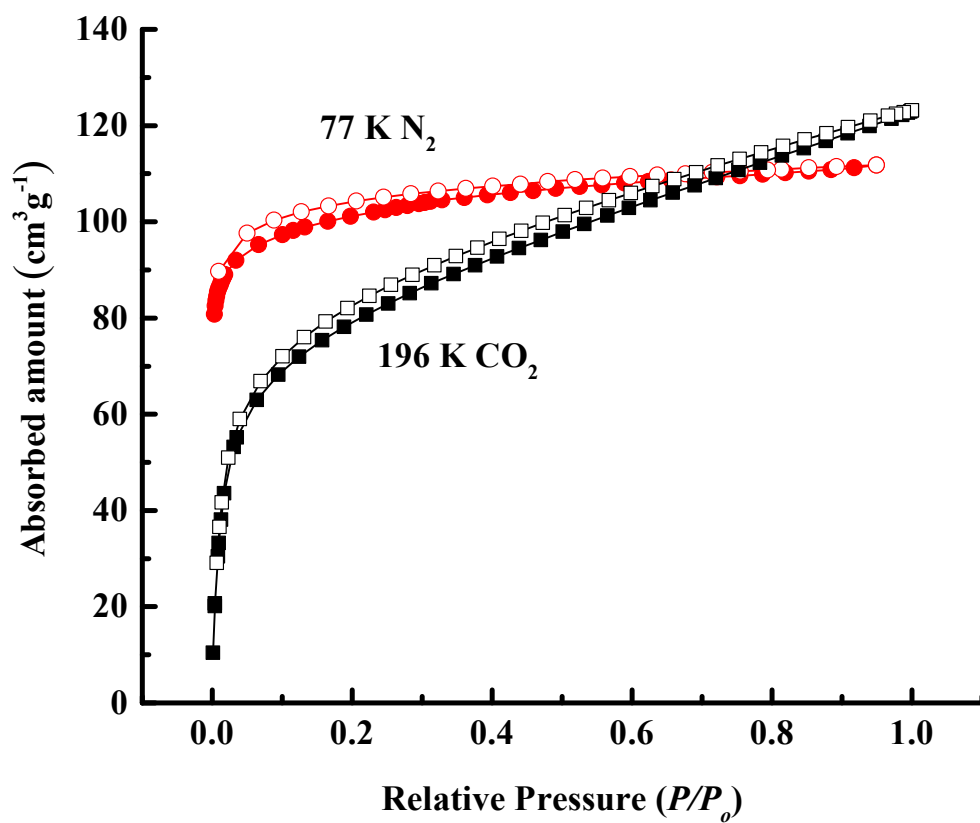

Figure S24. Gas adsorption isotherms of acetone exchanged Mn-PCM-48 activated at 296 K

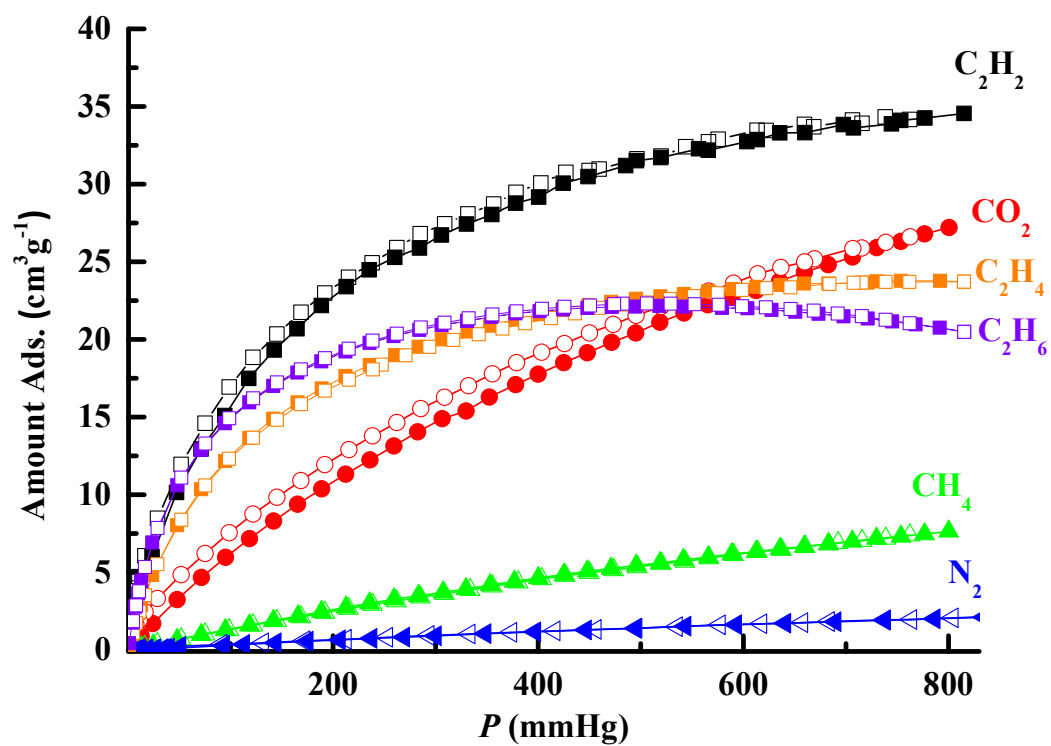

Figure S25. Gas sorption isotherms collected at 273 K of acetone exchanged Mn-PCM-48 activated at 296 K

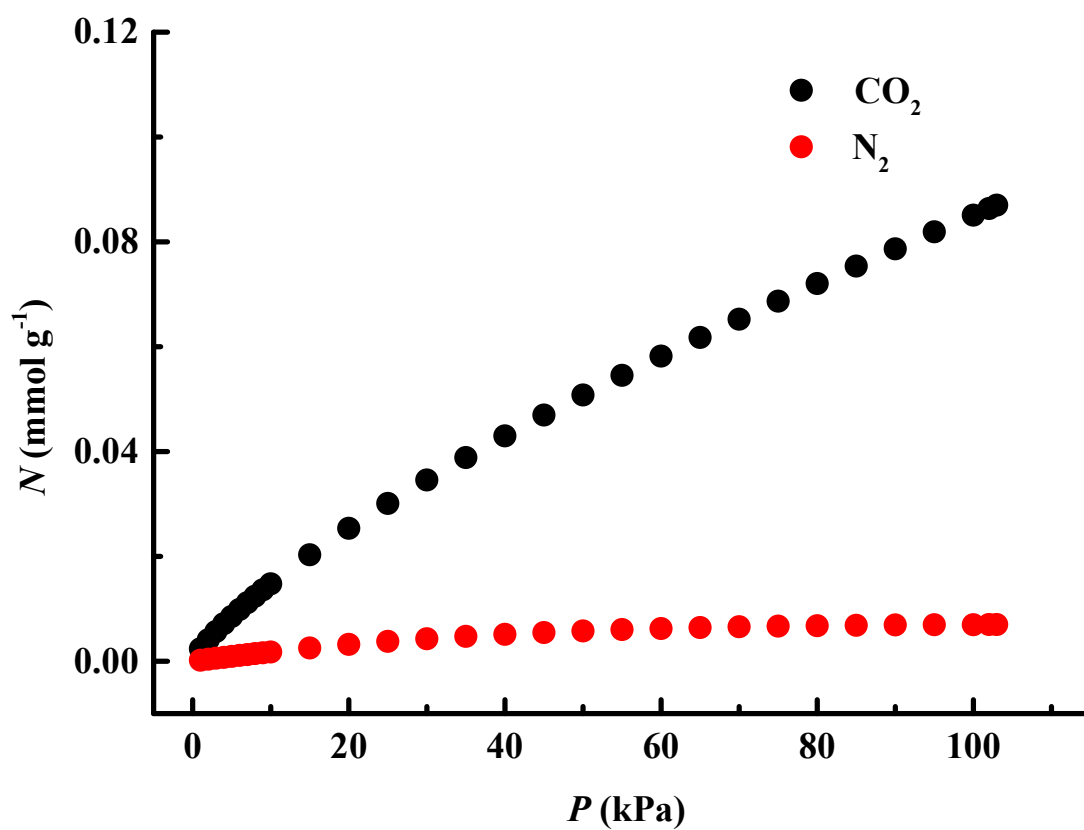

Figure S26. IAST calculation of the component molar loadings with a (15/85, v/v) CO<sub>2</sub>/ N<sub>2</sub> mixture at 296 K for Mn-PCM-48

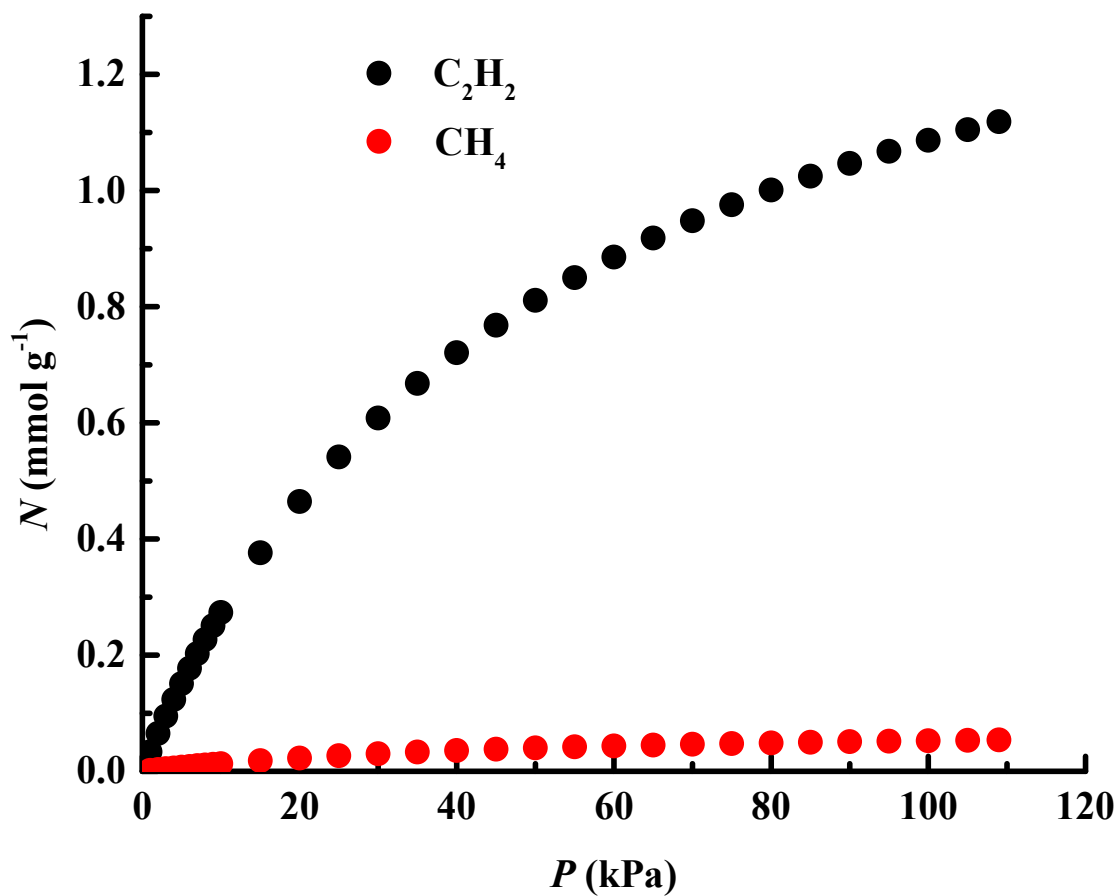

Figure S27. IAST calculation of the component molar loadings with an equimolar  $\text{C}_2\text{H}_2/\text{CH}_4$  (50/50, v/v) mixture at 296 K for Mn-PCM-48

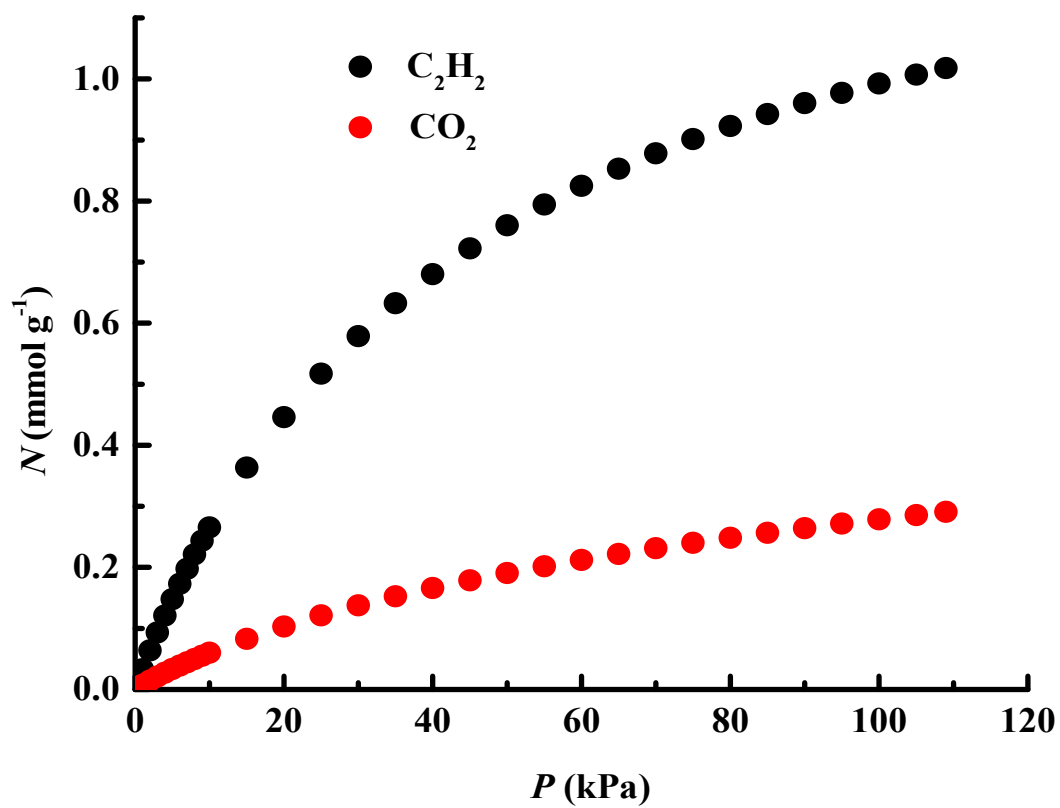

Figure S28. IAST calculation of the component molar loadings with an equimolar  $C_2H_2/CO_2$  (50/50, v/v) mixture at 296 K for Mn-PCM-48



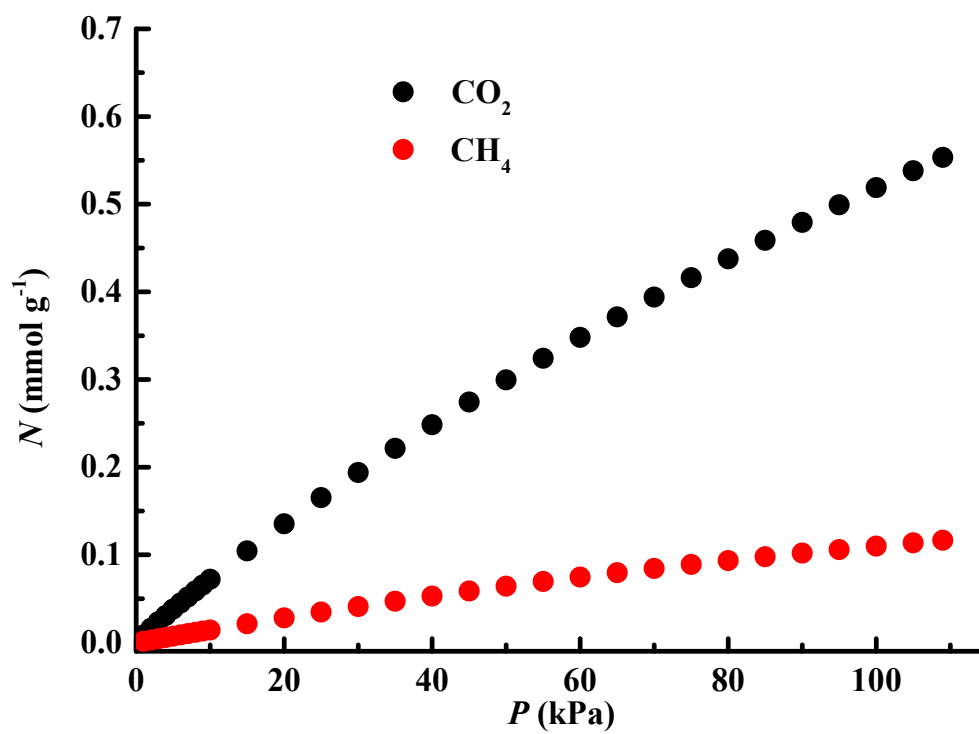

Figure S29. IAST calculation of the component molar loadings with an equimolar  $\text{CO}_2/\text{CH}_4$  mixture at 296 K for Mn-PCM-48

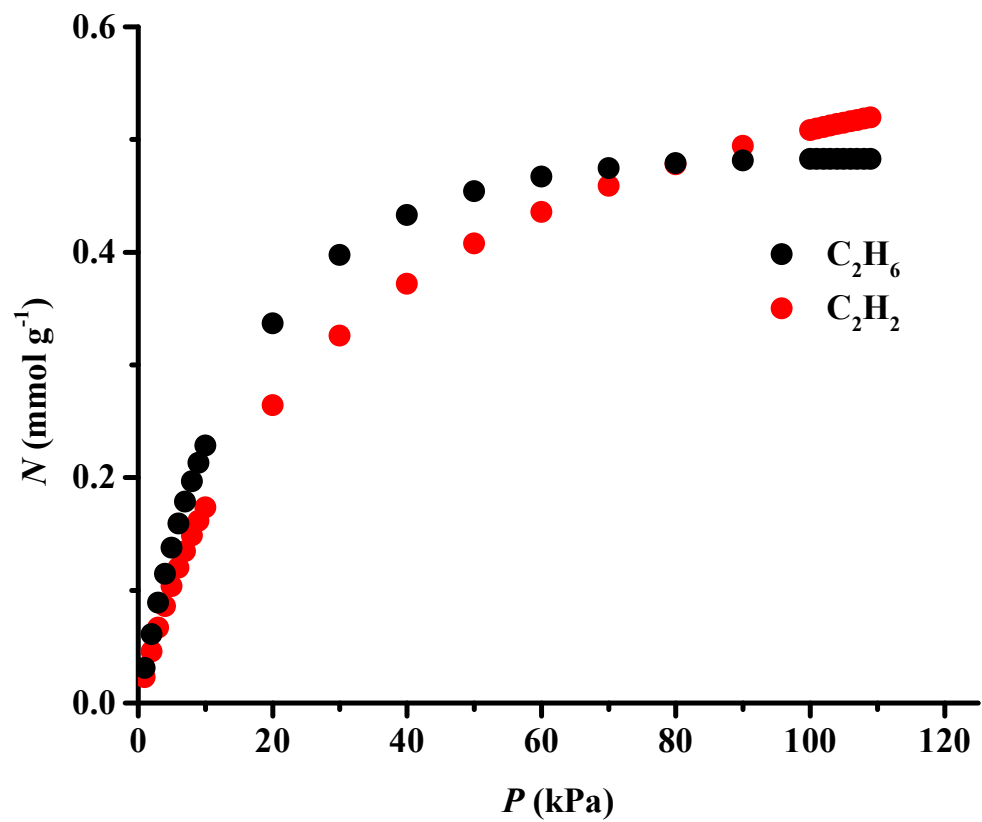

Figure S30. IAST calculation of the component molar loadings with an equimolar C<sub>2</sub>H<sub>2</sub>/C<sub>2</sub>H<sub>6</sub> (50/50, v/v) mixture at 296 K for Mn-PCM-48

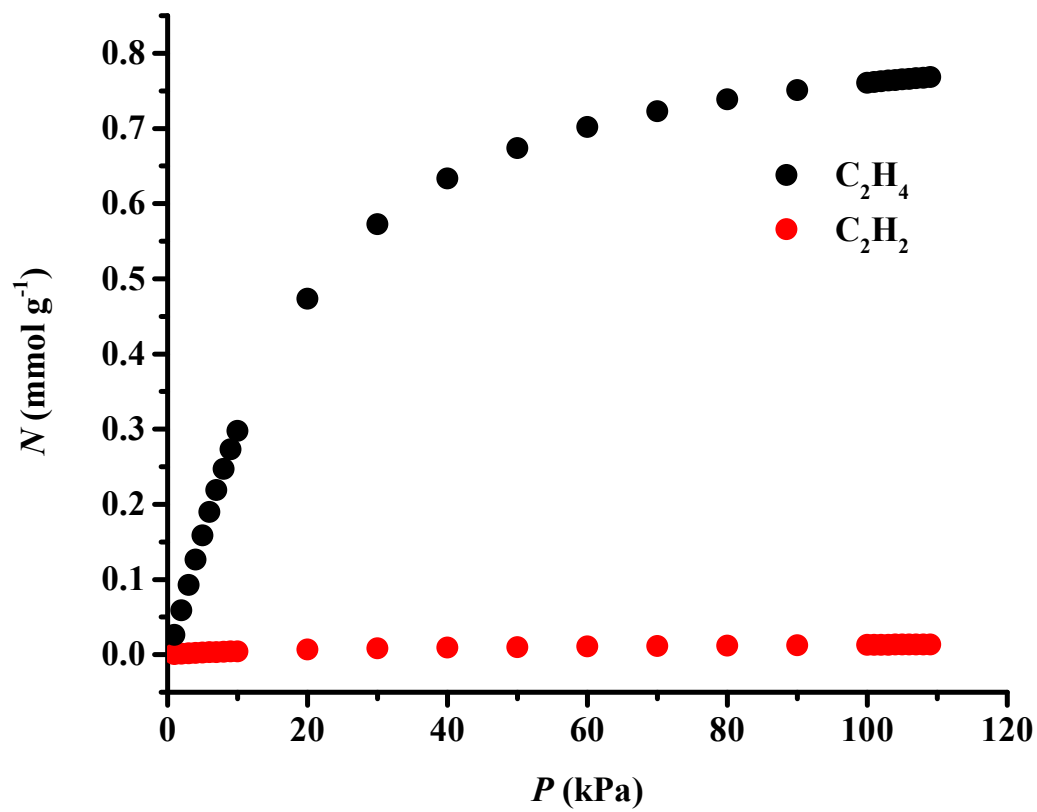

Figure S31. IAST calculation of the component molar loadings with a (1/99, v/v)  $\text{C}_2\text{H}_2/\text{C}_2\text{H}_4$  mixture at 296 K for Mn-PCM-48

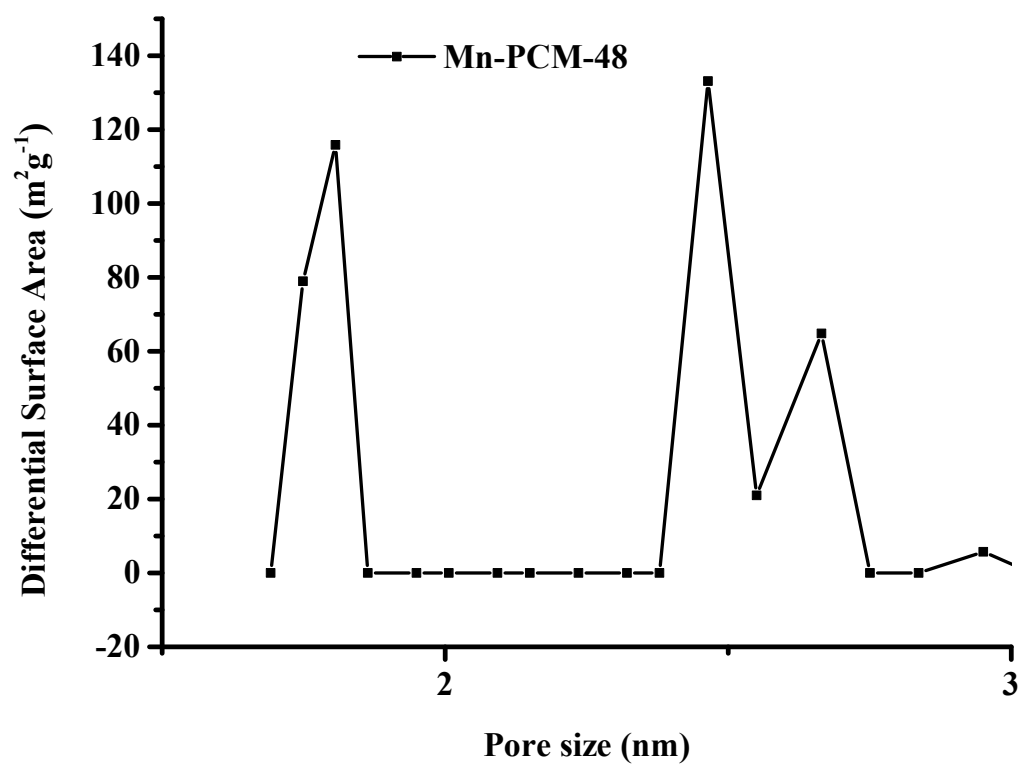

Figure S32. Pore size distribution plot of Mn-PCM-48 *via* N<sub>2</sub> 77K isotherm

## References

1. D. J. Tranchemontagne, K. S. Park, H. Furukawa, J. Eckert, C. B. Knobler and O. M. Yaghi, *J. Phys. Chem. C*, 2012, **116**, 13143–13151.
2. V. V. Afanasiev, I. P. Beletskaya, M. A. Kazankova, I. V. Efimova and M. U. Antipin, *Synthesis*, 2003, 2835–2838.
3. SAINT V8.27B Bruker AXS Inc, (2012), Madison, WI.
4. SHELXL-2013. Program for the Refinement of Crystal Structures. G. M., Sheldrick, *Acta Cryst.*, 2008, *A64*, 112-122.
5. WinGX 1.64. (1999). An Integrated System of Windows Programs for the Solution, Refinement and Analysis of Single Crystal X-ray Diffraction Data. L. J., Farrugia, *J. Appl. Cryst.*, 1999, **32**, 837-838.
6. International Tables for X-ray Crystallography (1992). Vol. C, Tables 4.2.6.8 and 6.1.1.4, A. J. C. Wilson, editor, Boston: Kluwer Academic Press.
7. Sheldrick, G. M. (1994). SHELXTL/PC (Version 5.03). Siemens Analytical X-ray Instruments, Inc., Madison, Wisconsin, USA.
8. P. B. Balbuena and K. E. Gubbins, *Langmuir*, 1993, **9**, 1801–1814.
9. A. L. Myers and J. M. Prausnitz, *AIChE J.*, 1965, **11**, 121–127.
